# Supplementary material for: A Novel Form of Chondrocyte Stress is Triggered by a COMP Mutation Causing Pseudoachondroplasia
Source: PubMed Central journal article supplement (PMC3320758; doi:10.1002/humu.21631), 2011-10-17
Supplement: humu0033-0218-SD1.pdf [file humu0033-0218-SD1.pdf]

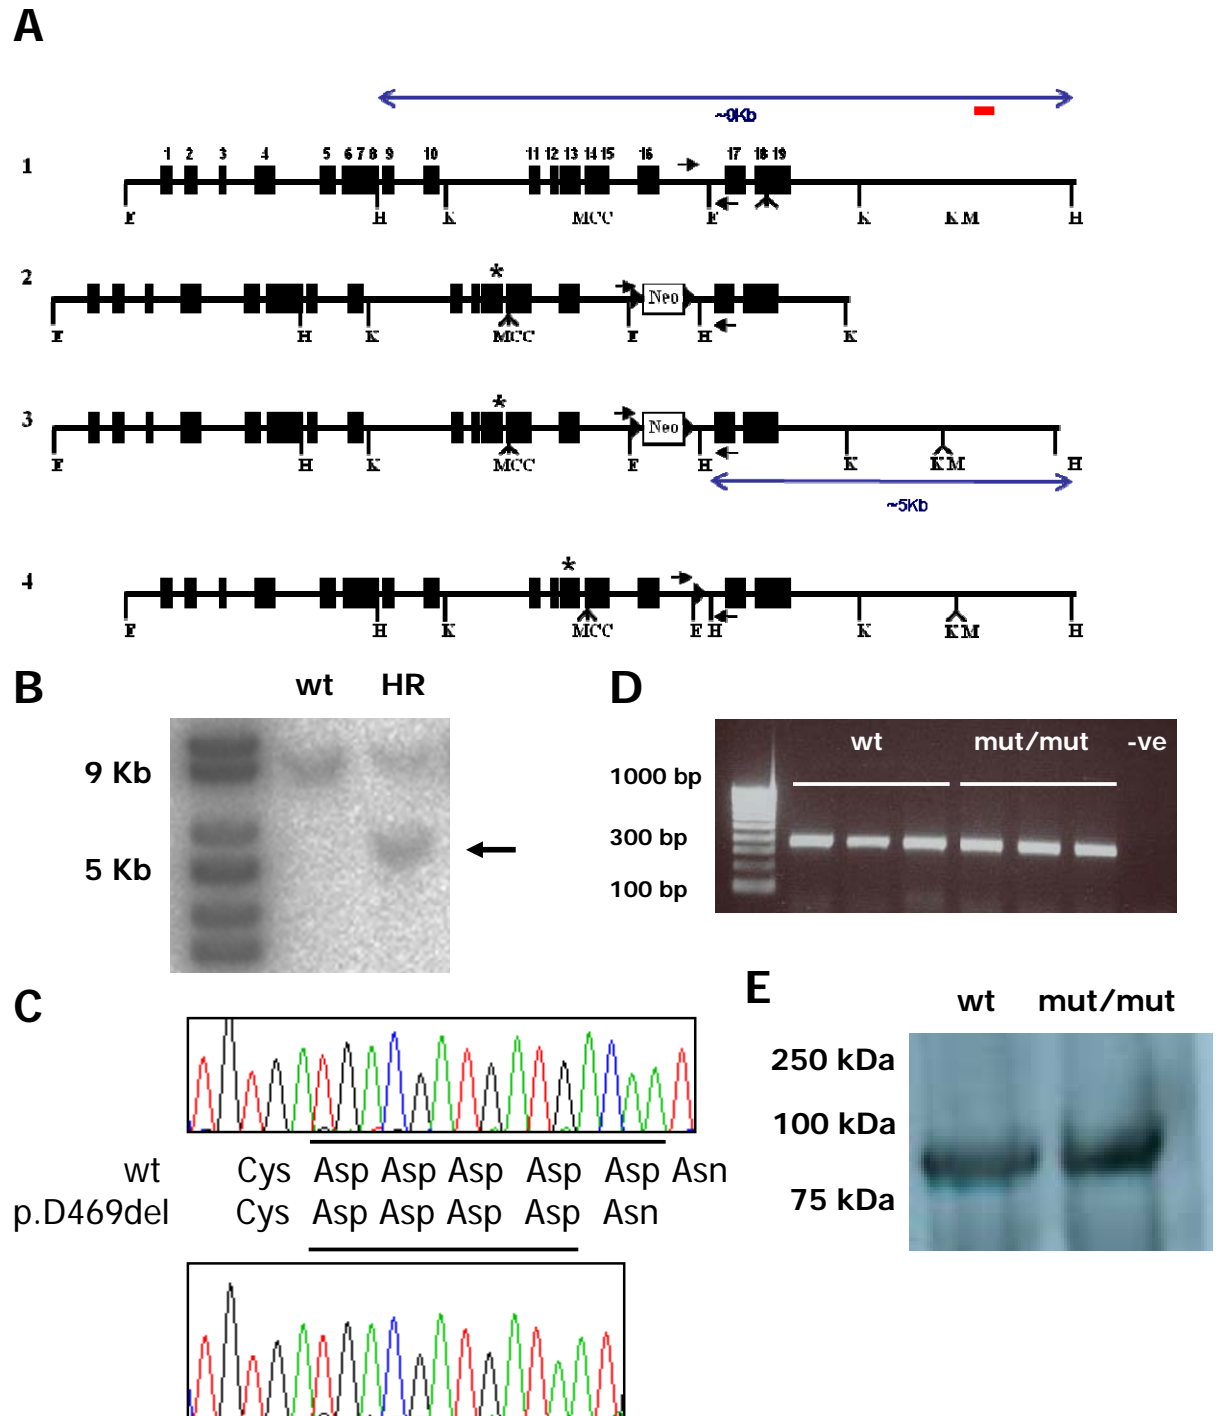

**Supp. Figure S1.** Targeting strategy to generate the Comp D469del PSACH mouse. **A**) 1) The genomic organisation of *Comp* showing the location of key restriction sites and the external probe (red bar). 2) The targeting construct with a *loxP* (arrowheads) flanked *Neo* cassette cloned into intron 16 of *Comp*. An asterisk marks the site of the introduced mutation in exon 13 of *Comp*. 3) Modified *Comp* locus following homologous recombination. The external probe detects the two *Hind* III restriction fragments (blue arrows). 4) The recombinant *Comp* allele following *Cre*-mediated recombination. Restriction enzyme sites

are:- E – *Eco* RI, H – *Hind* III, K – *Kpn* I, M – *Mlu* I, C – *Cla* I. **B)** Southern Blot showing wild-type (wt) and recombinant (HR) ES clones following *Hind* III digestion. **C)** DNA sequencing confirming that the mutation is present in the recombinant alleles. **D)** Agarose gel electrophoresis of PCR amplified cDNA confirming a lack of genomic DNA contamination. The correct cDNA fragments at ~350 bp were observed whilst there were no bands at ~700 bp corresponding to genomic DNA. **E)** SDS-PAGE and Western blot showing comparable levels of COMP protein in wild-type and mutant cartilage at 3 weeks of age. Key:- wt (wild-type), m/m (mice homozygous for the mutation).

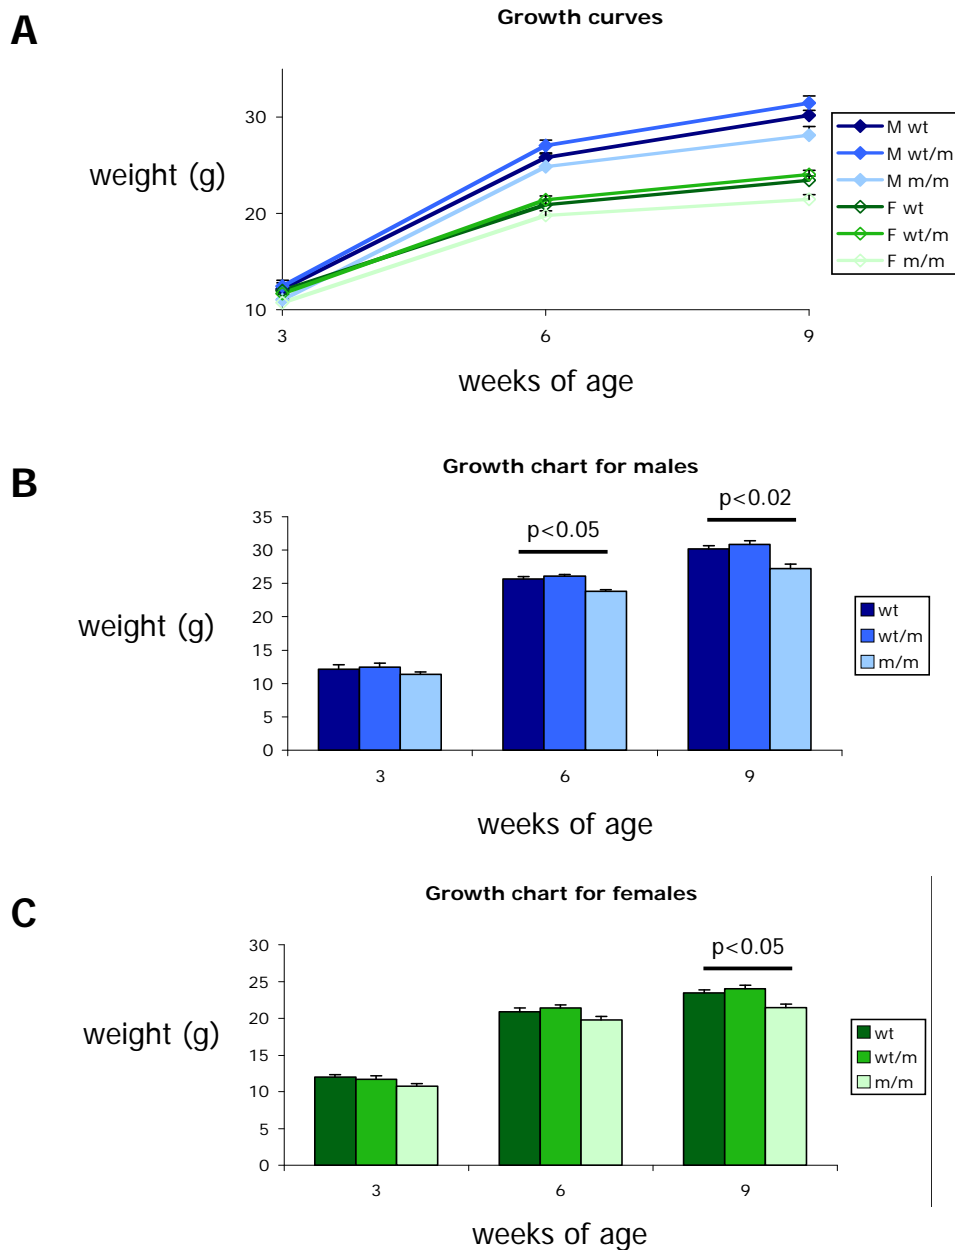

**Supp. Figure S2.** Growth curves for mice over a 9-week time period. Male and female mice were weighed at 3, 6 and 9 weeks after birth and their weights charted. **A)** Male and female mice homozygous for *Comp*: $\Delta$ D469 mutation had slower growth curves than wild type and heterozygous mutant animals. Separate growth charts for males and females are shown at 3, 6 and 9 weeks for mice of all three genotypes. **B)** Homozygous *Comp* p.D469del males were significantly smaller than their litter-mates at 6 weeks and 9 weeks of age. **C)** Homozygous *Comp* p.D469del females were significantly smaller than their littermates by 9 weeks of age. N=7 mice per sex per genotype, One-Way ANOVA.

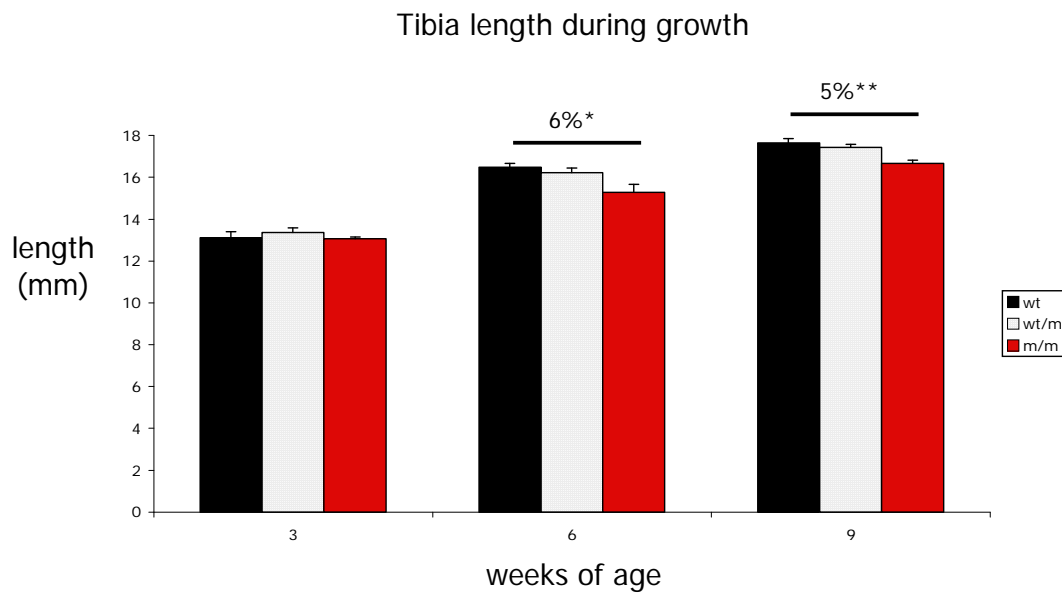

**Supp. Figure S3.** Measurement of tibia length from male mice between 3 and 9 weeks of age. Tibias lengths of male mice were measured at 3, 6 and 9 weeks of age for wild type, heterozygous and homozygous *Comp* p.D469del littermates. Tibias from mice homozygous for *Comp* p.D469del were significantly shorter than their littermates at 6 and 9 weeks of age.  $N > 7$  mice per genotype, One-way ANOVA .

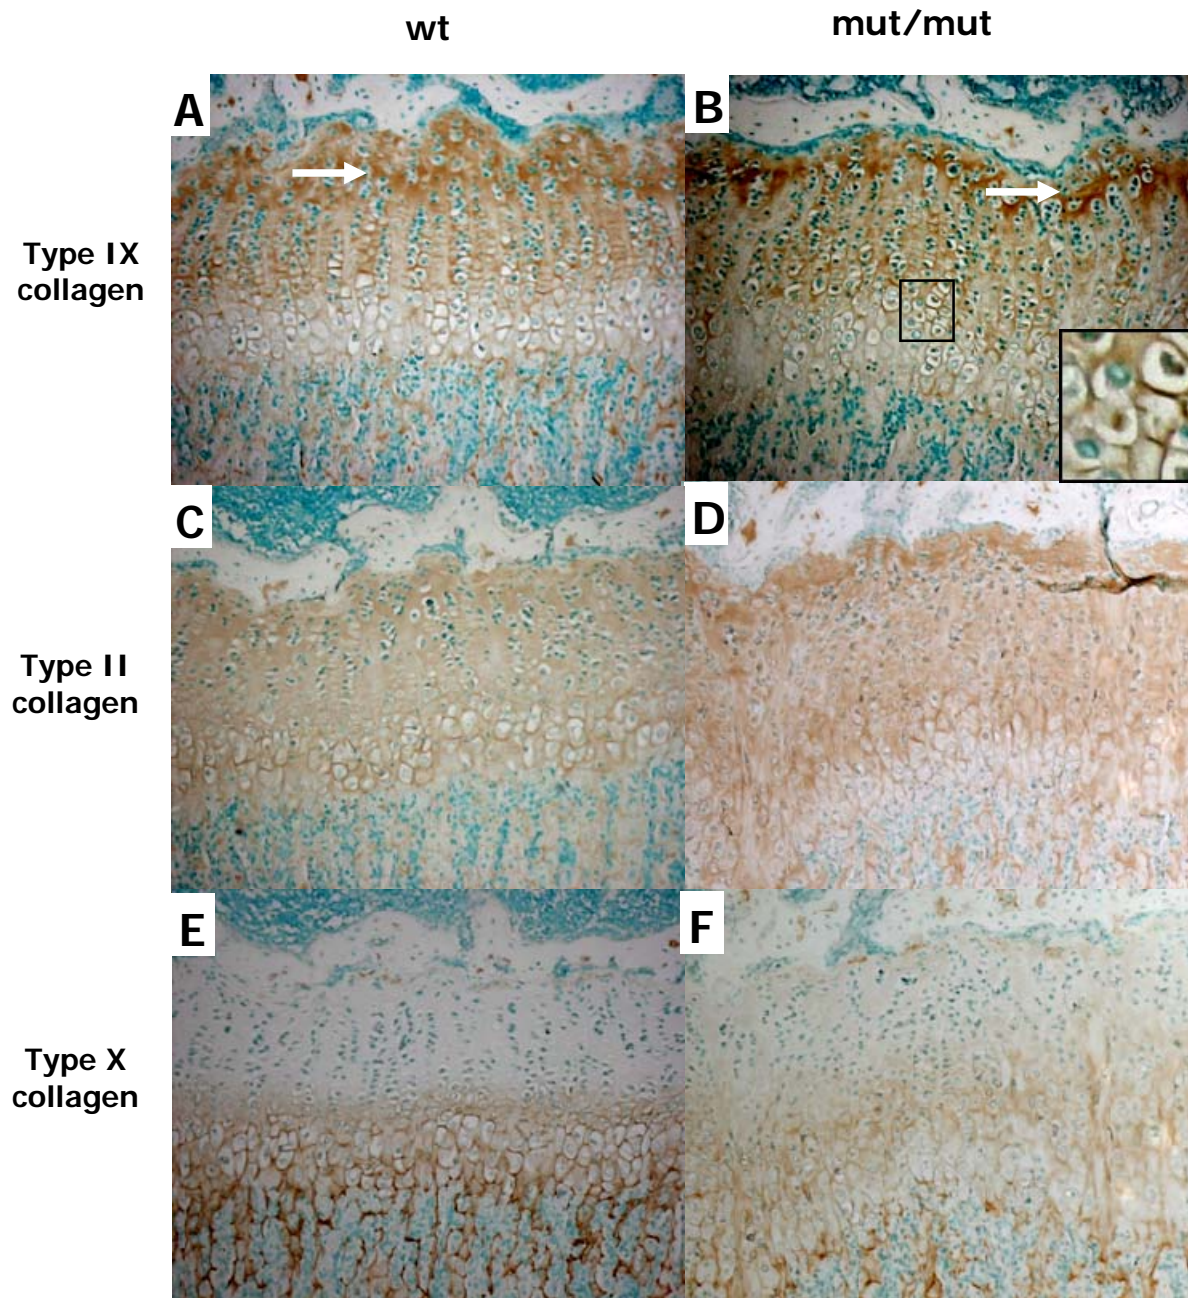

**Supp. Figure S4.** Representative images of wild type (wt) and mutant (mut/mut) growth plates showing the localisation of cartilage collagen proteins. **A & B)** IHC using a type IX collagen antibody showed some intracellular retention in mutant chondrocytes (**insert**), whilst staining to type IX collagen was more pronounced in the resting zone (**white arrow**) and in the pericellular region of the early proliferative zones of both wild type and mutant growth plates. **C & D)** IHC using a type II collagen antibody demonstrated patchy mislocalisation in the mutant growth plate, whilst type X collagen (**E & F**) was also diffuse in the growth plate of mice homozygous for p.D469del.

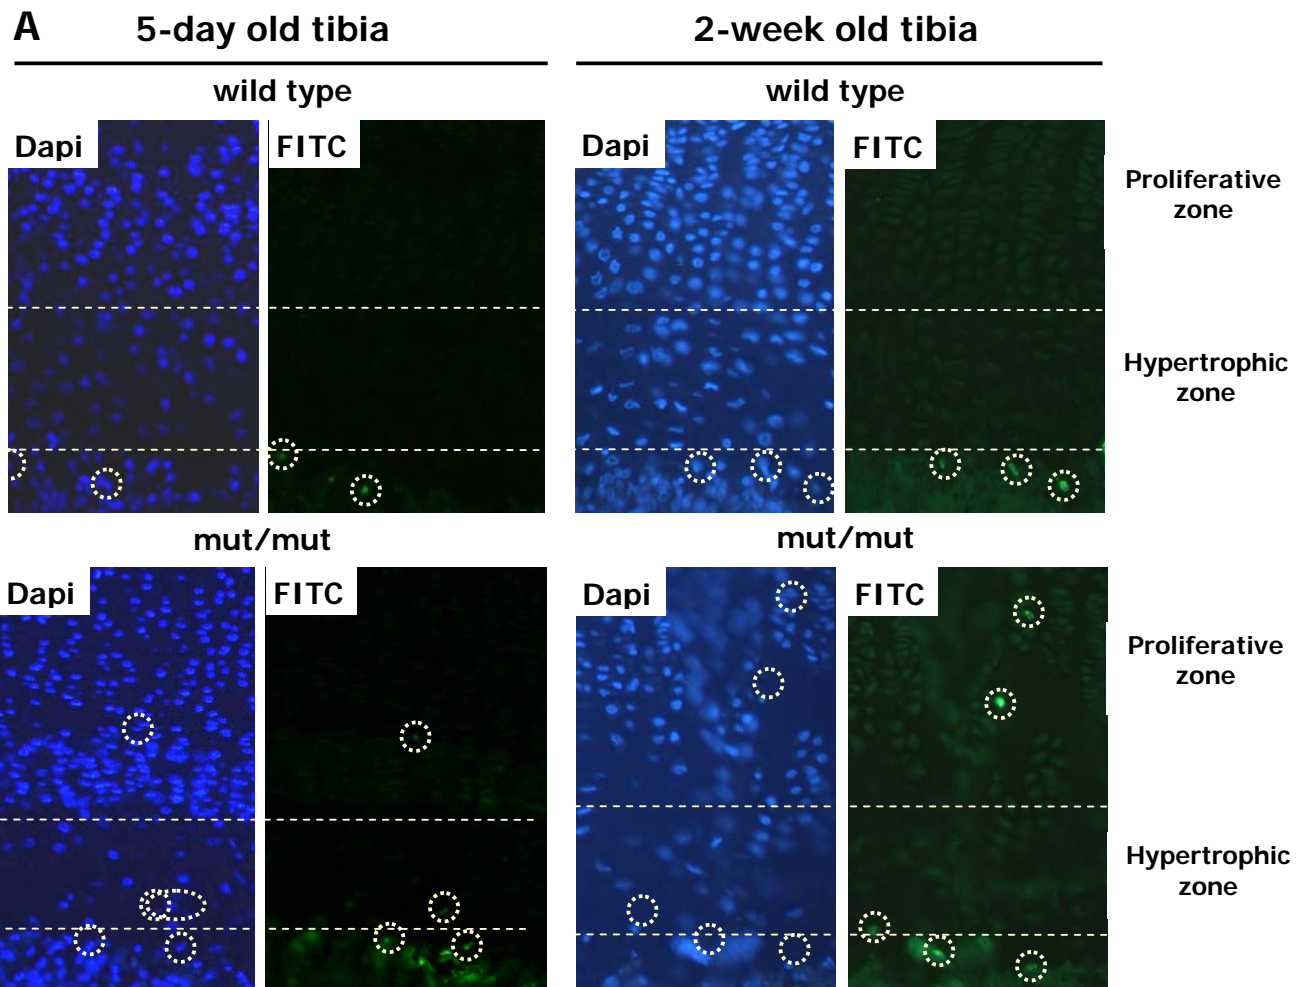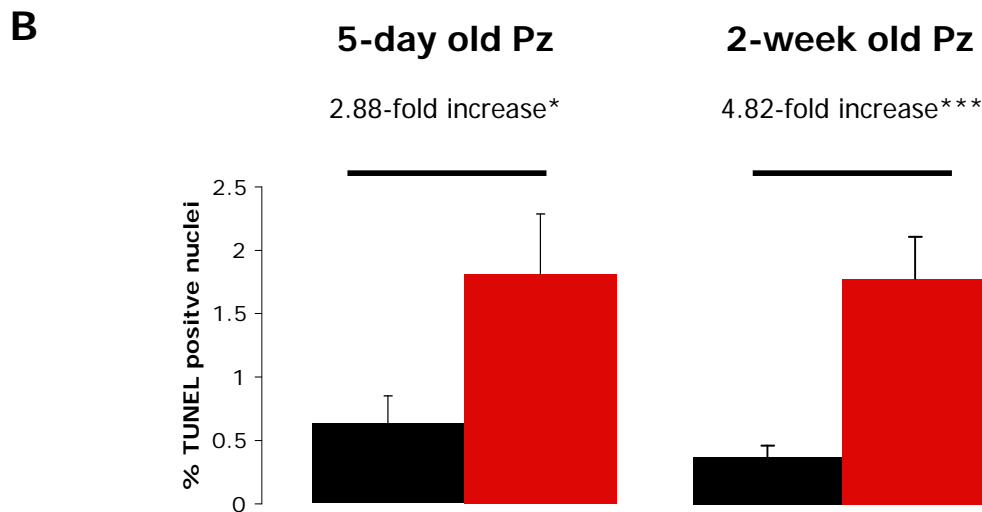

**Supp. Figure S5.** Time of onset and progression of apoptosis in the growth plate of *Comp* D469del mice. **A)** TUNEL positive cells (white circles) were detected in the proliferative zones of growth plates from mice homozygous for the p.D469del COMP mutation, but not in their wild-type littermates. **B)** Quantification of the TUNEL assay results showed a significant increase in apoptosis in the proliferative zone of growth plates from mice homozygous for the mutation (n=36 section from 3 mice per genotype, independent samples t-test, \* p<0.05, \*\*\*p<0.001).

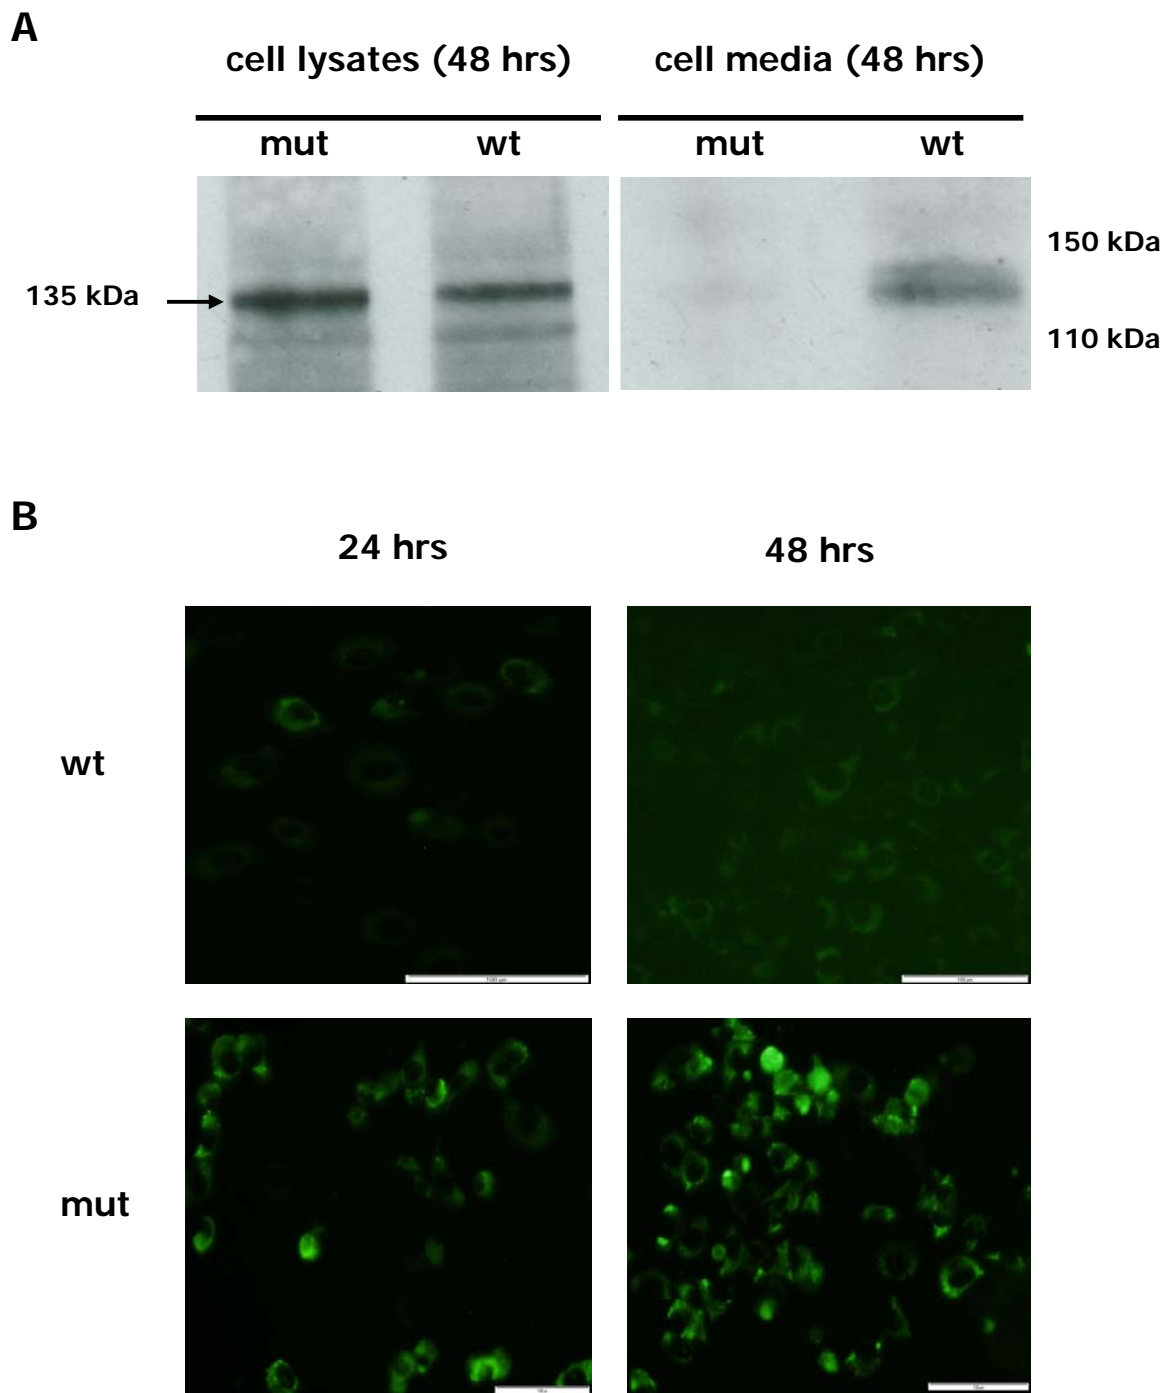

**Supp. Figure S6.** HT1080 cells show retention of mutant COMP. **A)** Cell lysate and medium samples were collected at 48 hr post confluence from wild-type and mutant COMP-GFP cell lines. Approximately 20  $\mu$ g of protein was resolved by 4-10% SDS-PAGE and Western blotted with a COMP specific antibody (diluted 1:500, Genetex). A ~135 kDa band was present in the media from the wild-type cell line which was absent in the mutant cell line. **B)** HT1080 cells expressing recombinant wild-type and mutant p.D469del COMP-GFP fusion protein were grown in cell culture medium and analysed under fluorescent microscope at 24 and 48 hrs after cells were seeded (357.1 exposure time). Cells harboring p.D469del COMP mutation show intercellular localisation of mutant protein. Scale bar 100 $\mu$ m. Key: wt (wild-type); mut (mutant).

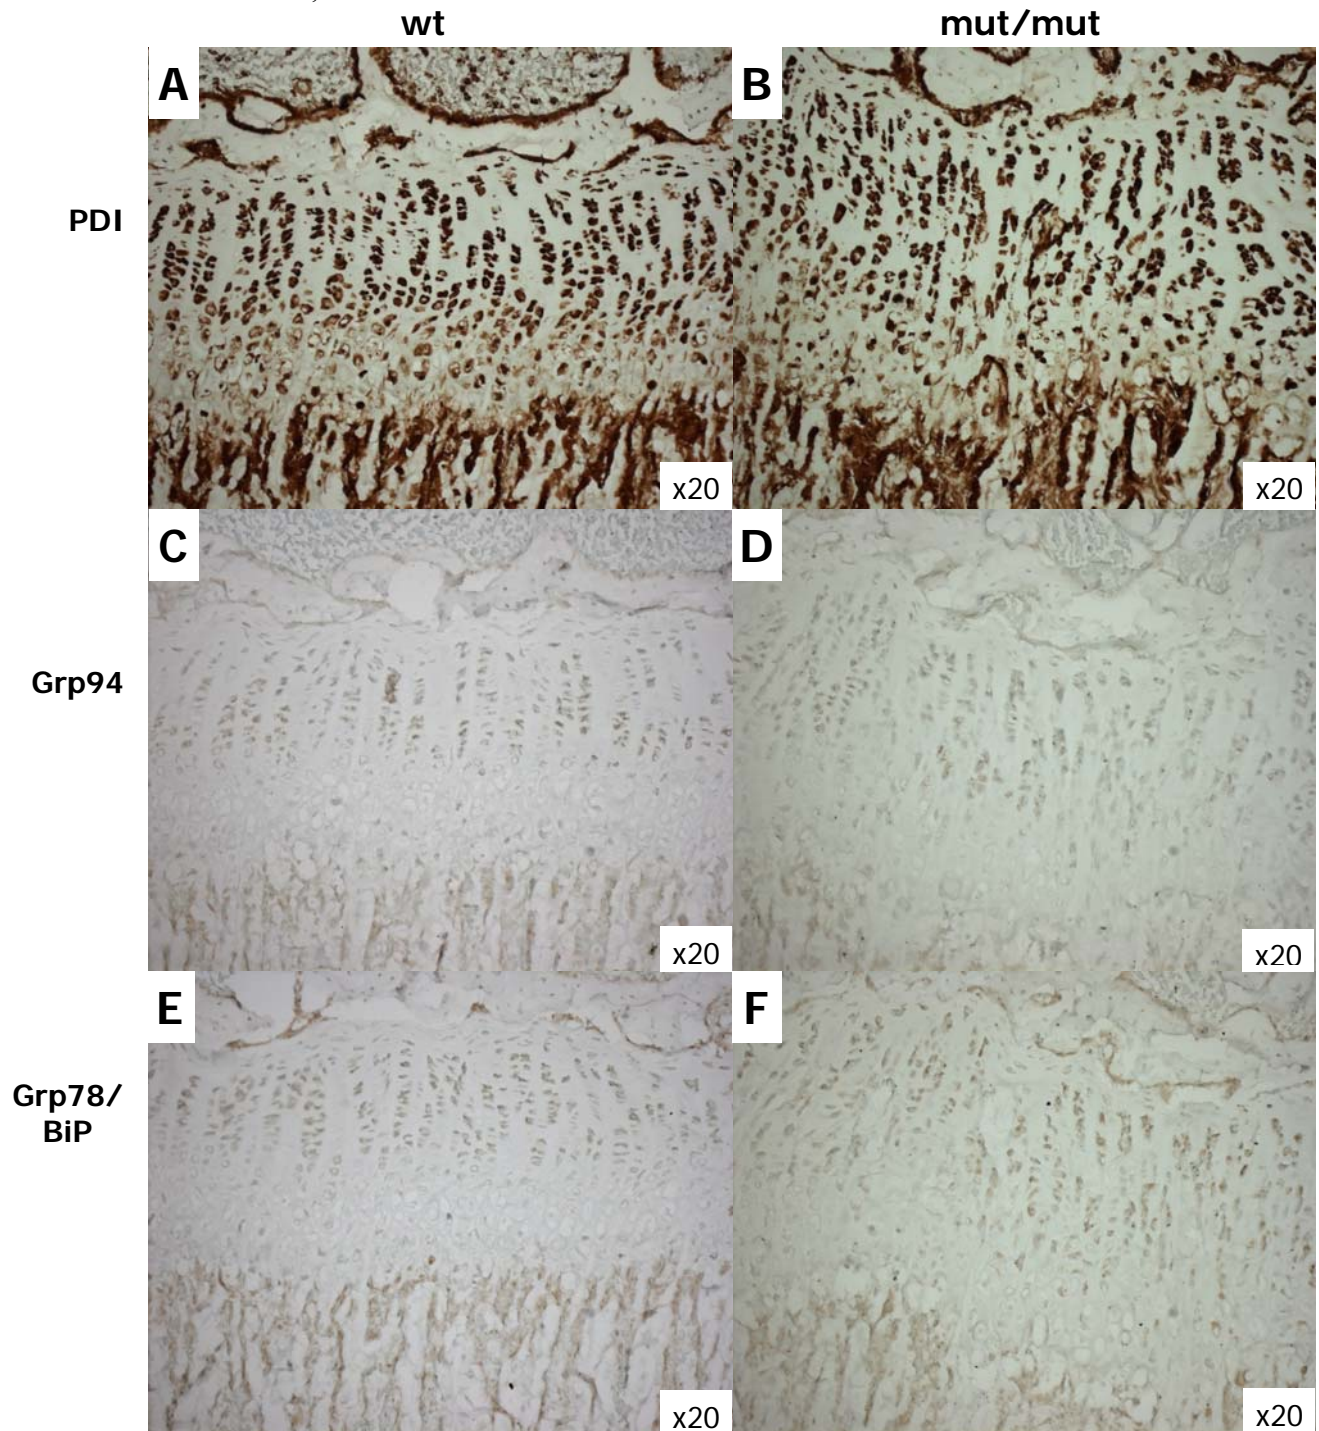

**Supp. Figure S7.** Representative images of wild type (wt) and mutant (mut/mut) growth plates showing the localisation of ER resident chaperone proteins. **A & B**) IHC using an antibody against PDI **C & D**) IHC using an antibody against Grp94. **E & F**) IHC using an antibody against Grp78/BiP.



**Supp. Table S1. The fold change in the relative expression levels of UPR, ERAD and cartilage genes in homozygous *Comp* p.D469del mice at new born and 5-days of age**

RNA was isolated the rib chondrocytes of new born and 5 day-old wild-type and *Comp* p.D469del<sup>m/m</sup> mutant mice. The relative expression levels of genes calculated using the Robust Multiarray Averaging (RMA) method are shown with the significance value given in parentheses. Highlighted in yellow are values that reach a statistical significance difference compared to wild-type (i.e. P<0.05). The gene order and categorization of the genes is based on that published by Cameron et al PLoS ONE (*in press*).

| <b>The classical receptors of endoplasmic reticulum stress</b> |                                                                      | <b>Genotype</b>  |                |                |
|----------------------------------------------------------------|----------------------------------------------------------------------|------------------|----------------|----------------|
| NCBI                                                           | Gene Name                                                            | Gene Symbol      | D469del m/m NB | D469del m/m 5D |
| NM_001081304                                                   | Activating transcription factor 6                                    | <i>Atf6</i>      | 1.14 (0.433)   | 1.13 (0.972)   |
| NM_023913                                                      | Endoplasmic reticulum to nucleus signalling 1                        | <i>Ern1</i>      | -1.21 (0.256)  | -1.05 (0.999)  |
| NM_010121                                                      | Eukaryotic translation initiation factor 2 alpha kinase 3            | <i>Eif2ak3</i>   | 1.17 (0.432)   | 1.11 (0.999)   |
| <b>The downstream genes of the ER stress receptor pathways</b> |                                                                      |                  |                |                |
| NCBI                                                           | Gene Name                                                            | Gene Symbol      |                |                |
| <b><i>Atf6</i>-related:-</b>                                   |                                                                      |                  |                |                |
| NM_009722                                                      | ATPase, Ca <sup>++</sup> transporting, cardiac muscle, slow twitch 2 | <i>Atp2a2</i>    | 1.20 (0.428)   | -1.06 (0.999)  |
| NM_007837                                                      | DNA-damage inducible transcript 3                                    | <i>Ddit3</i>     | -1.20 (0.368)  | 1.16 (0.875)   |
| NM_022310                                                      | Heat shock protein 5                                                 | <i>Hspa5</i>     | 1.17 (0.499)   | 1.11 (0.999)   |
| NM_027400                                                      | Lectin, mannose-binding, 1                                           | <i>Lman1</i>     | 1.40 (0.289)   | 1.12 (0.999)   |
| NM_029103                                                      | Mesencephalic astrocyte-derived neurotrophic factor                  | <i>Manf</i>      | 1.43 (0.210)   | 1.13 (0.999)   |
| NM_008725                                                      | Natriuretic protein precursor type A                                 | <i>Nppa</i>      | -1.14 (0.272)  | -1.03 (0.999)  |
| NM_011850                                                      | Nuclear receptor subfamily 0, group b, member 2                      | <i>Nr0b2</i>     | -1.07 (0.512)  | -1.02 (0.999)  |
| NM_008814                                                      | Pancreatic and duodenal homeobox 1                                   | <i>Pdx1</i>      | -1.26 (0.170)  | -1.01 (0.999)  |
| NM_028769                                                      | Synovial apoptosis inhibitor 1 (Synoviolin)                          | <i>Syvn1</i>     | 1.11 (0.422)   | -1.15 (0.996)  |
| NM_020275                                                      | Tumor necrosis factor receptor superfamily, member 10b               | <i>Tnfrsf10b</i> | -1.86 (0.112)  | -1.22 (0.836)  |
| NM_013842                                                      | X-box binding protein 1                                              | <i>Xbp1</i>      | 1.05 (0.640)   | 1.01 (0.999)   |
| <b><i>Eif2ak3</i>-related:-</b>                                |                                                                      |                  |                |                |
| NM_007498                                                      | Activating transcription factor 3                                    | <i>Atf3</i>      | -1.21 (0.493)  | -1.01 (0.999)  |
| NM_007837                                                      | DNA-damage inducible transcript 3                                    | <i>Ddit3</i>     | -1.19 (0.368)  | 1.16 (0.933)   |
| NM_001005509                                                   | Eukaryotic translation initiation factor 2a                          | <i>Eif2a</i>     | 1.05 (0.559)   | 1.10 (0.999)   |
| NM_026114                                                      | Eukaryotic translation initiation factor 2, subunit 1 alpha          | <i>Eif2s1</i>    | -1.21 (0.357)  | 1.07 (0.999)   |
| NM_023913                                                      | Endoplasmic reticulum to nucleus signalling 1                        | <i>Ern1</i>      | -1.21 (0.256)  | -1.05 (0.999)  |
| NM_022310                                                      | Heat shock protein 5                                                 | <i>Hspa5</i>     | 1.17 (0.499)   | 1.11 (0.999)   |

|                                                                              |                                                                |                    |               |               |
|------------------------------------------------------------------------------|----------------------------------------------------------------|--------------------|---------------|---------------|
| NM_010481                                                                    | Heat shock protein 9                                           | <i>Hspa9</i>       | -1.10 (0.532) | 1.05 (0.999)  |
| NM_010512                                                                    | Insulin-like growth factor 1                                   | <i>Igf1</i>        | 1.24 (0.567)  | 2.02 (0.495)  |
| NM_028782                                                                    | Ion peptidase 1, mitochondrial                                 | <i>Lonp1</i>       | -1.04 (0.999) | -1.11 (0.610) |
| NM_010902                                                                    | Nuclear factor, erythroid derived 2, like 2                    | <i>Nfe2l2</i>      | -1.01 (0.691) | 1.14 (0.922)  |
| NM_008689                                                                    | Nuclear factor of light polypeptide gene enhancer in B-cells 1 | <i>Nfkb1</i>       | -1.91 (0.138) | -1.17 (0.999) |
| NM_019408                                                                    | Nuclear factor of light polypeptide gene enhancer in B-cells 2 | <i>Nfkb2</i>       | -1.47 (0.209) | -1.17 (0.999) |
| NM_008654                                                                    | Protein phosphatase 1, regulatory (inhibitor) subunit 15a      | <i>Ppp1r15a</i>    | -1.16 (0.442) | -1.19 (0.912) |
| NM_001039521                                                                 | Rrn3 RNA polymerase I transcription factor homolog (yeast)     | <i>Rrn3</i>        | -1.01 (0.999) | -1.17 (0.689) |
| NM_011716                                                                    | Wolfram syndrome 1 homolog                                     | <i>Wfs1</i>        | -1.21 (0.414) | -1.04 (0.999) |
|                                                                              |                                                                |                    |               |               |
| <b><i>Ern1-related:-</i></b>                                                 |                                                                |                    |               |               |
| NM_001081304                                                                 | Activating transcription factor 6                              | <i>Atf6</i>        | 1.14 (0.433)  | 1.13 (0.972)  |
| NM_007837                                                                    | DNA-damage inducible transcript 3                              | <i>Ddit3</i>       | -1.20 (0.368) | 1.16 (0.836)  |
| NM_022310                                                                    | Heat shock protein 5                                           | <i>Hspa5</i>       | 1.17 (0.499)  | 1.11 (0.999)  |
| NM_011952                                                                    | Mitogen-activated protein kinase 3                             | <i>Mapk3</i>       | 1.10 (0.535)  | -1.11 (0.999) |
| NM_016700                                                                    | Mitogen-activated protein kinase 8                             | <i>Mapk8</i>       | 1.15 (0.468)  | -1.04 (0.999) |
| NM_008689                                                                    | Nuclear factor of light polypeptide gene enhancer in B-cells 1 | <i>Nfkb1</i>       | -1.91 (0.138) | -1.17 (0.999) |
| NM_019408                                                                    | Nuclear factor of light polypeptide gene enhancer in B-cells 2 | <i>Nfkb2</i>       | -1.47 (0.209) | -1.17 (0.999) |
| NM_015760                                                                    | NADPH oxidase 4                                                | <i>Nox4</i>        | 2.21 (0.57)   | 1.58 (0.656)  |
| NM_011951                                                                    | Mitogen-activated protein kinase 14                            | <i>Mapk14</i>      | 1.03 (0.394)  | 1.03 (0.999)  |
| NM_028769                                                                    | Synovial apoptosis inhibitor 1 (Synoviolin)                    | <i>Syvn1</i>       | 1.11 (0.422)  | -1.15 (0.996) |
| NM_013693                                                                    | Tumor necrosis factor                                          | <i>Tnf</i>         | -1.29 (0.112) | 1.06 (0.999)  |
| NM_020275                                                                    | Tumor necrosis factor receptor superfamily, member 10b         | <i>Tnfrsf10b</i>   | -1.86 (0.112) | -1.22 (0.791) |
| NM_011716                                                                    | Wolfram syndrome 1 homolog                                     | <i>Wfs1</i>        | -1.21 (0.414) | -1.04 (0.999) |
| NM_013842                                                                    | X-box binding protein 1                                        | <i>Xbp1</i>        | 1.05 (0.640)  | 1.01 (0.999)  |
|                                                                              |                                                                |                    |               |               |
|                                                                              |                                                                |                    |               |               |
| <b><i>Additional ER stress sensors</i></b>                                   |                                                                |                    |               |               |
| NCBI                                                                         | Gene Name                                                      | <i>Gene Symbol</i> |               |               |
|                                                                              |                                                                |                    |               |               |
| NM_030080                                                                    | Androgen induced bZIP transcription factor                     | <i>Aibzip</i>      | -1.12 (0.421) | 1.22 (0.999)  |
| NM_178661                                                                    | BBF2 human homolog on chromosome 7                             | <i>Bbf2h7</i>      | 1.04 (0.643)  | -1.16 (0.999) |
| NM_145365                                                                    | cAMP responsive element binding protein 3-like 3               | <i>Crebh</i>       | 1.03 (0.657)  | 1.00 (0.999)  |
| NM_013497                                                                    | cAMP responsive element binding 3                              | <i>Luman</i>       | 1.16 (0.177)  | 1.06 (0.999)  |
| NM_011957                                                                    | Old astrocyte specifically induced substance                   | <i>Oasis</i>       | 2.01 (0.139)  | -1.04 (0.999) |
|                                                                              |                                                                |                    |               |               |
|                                                                              |                                                                |                    |               |               |
| <b><i>Endoplasmic reticulum associated degradation (ERAD) components</i></b> |                                                                |                    |               |               |
| NCBI                                                                         | Gene Name                                                      | <i>Gene Symbol</i> |               |               |

|                              |                                                                                                |                    |               |               |
|------------------------------|------------------------------------------------------------------------------------------------|--------------------|---------------|---------------|
| NM_007597                    | Calnexin                                                                                       | <i>Canx</i>        | 1.12 (0.506)  | 1.22 (0.972)  |
| NM_007591                    | Calreticulin                                                                                   | <i>Calr</i>        | 1.20 (0.413)  | 1.09 (0.999)  |
| NM_024207                    | Der1-like domain family, member 1 (Derlin 1)                                                   | <i>Derl1</i>       | -1.06 (0.576) | 1.04 (0.999)  |
| NM_033562                    | Der1-like domain family, member 2 (Derlin 2)                                                   | <i>Derl2</i>       | -1.08 (0.541) | 1.11 (0.949)  |
| NM_024440                    | Der1-like domain family, member 3 (Derlin 3)                                                   | <i>Derl3</i>       | -1.04 (0.619) | -1.04 (0.999) |
| NM_010072                    | Dolichol-phosphate (beta-D) mannosyltransferase 1                                              | <i>Dpm1</i>        | 1.17 (0.407)  | 1.13 (0.999)  |
| NM_010073                    | Dolichol-phosphate (beta-D) mannosyltransferase 2                                              | <i>Dpm2</i>        | -1.09 (0.487) | -1.04 (0.999) |
| NM_138677                    | ER degradation enhancer, mannosidase alpha-like 1                                              | <i>Edem1</i>       | 1.18 (0.376)  | -1.02 (0.999) |
| NM_145537                    | ER degradation enhancer, mannosidase alpha-like 2                                              | <i>Edem2</i>       | 1.08 (0.292)  | 1.04 (0.999)  |
| NM_001039644                 | ER degradation enhancer, mannosidase alpha-like 3                                              | <i>Edem3</i>       | 1.57 (0.183)  | 1.09 (0.999)  |
| NM_022331                    | Homocysteine-inducible, endoplasmic reticulum stress-inducible, ubiquitin-like domain member 1 | <i>Herpud1</i>     | 1.33 (0.248)  | 1.04 (0.999)  |
| NM_020586                    | HERPUD family member 2                                                                         | <i>Herpud2</i>     | 1.06 (0.415)  | 1.31 (0.988)  |
| NM_007952                    | Protein disulphide isomerase associated 3                                                      | <i>Pdia3</i>       | 1.38 (0.264)  | 1.12 (0.965)  |
| NM_009787                    | Protein disulphide isomerase associated 4                                                      | <i>Pdia4</i>       | -1.08 (0.604) | 1.76 (0.407)  |
| NM_028295                    | Protein disulphide isomerase associated 5                                                      | <i>Pdia5</i>       | 1.22 (0.325)  | 1.07 (0.999)  |
| NM_027959                    | Protein disulphide isomerase associated 6                                                      | <i>Pdia6</i>       | 1.31 (0.196)  | -1.09 (0.999) |
| NM_016906                    | Sec61 alpha subunit 1                                                                          | <i>Sec61a1</i>     | 1.22 (0.477)  | 1.12 (0.974)  |
| NM_021305                    | Sec61 alpha subunit 2                                                                          | <i>Sec61a2</i>     | 1.08 (0.585)  | 1.03 (0.999)  |
| NM_008408                    | STT3, subunit of the oligosaccharyltransferase complex, homolog A                              | <i>Stt3a</i>       | 1.02 (0.558)  | 1.13 (0.996)  |
| NM_024222                    | STT3, subunit of the oligosaccharyltransferase complex, homolog A                              | <i>Stt3b</i>       | 1.05 (0.575)  | 1.15 (0.999)  |
| NM_028769                    | Synovial apoptosis inhibitor 1 (Synoviolin)                                                    | <i>Syvn1</i>       | 1.11 (0.422)  | -1.15 (0.996) |
|                              |                                                                                                |                    |               |               |
|                              |                                                                                                |                    |               |               |
| <b>Proteasomal subunits:</b> |                                                                                                |                    |               |               |
| NCBI                         | Gene Name                                                                                      | <i>Gene Symbol</i> |               |               |
|                              |                                                                                                |                    |               |               |
| NM_011965                    | Proteasome (prosome, macropain) subunit, alpha type 1                                          | <i>Psm1</i>        | 1.05 (0.611)  | 1.12 (0.999)  |
| NM_008944                    | Proteasome (prosome, macropain) subunit, alpha type 2                                          | <i>Psm2</i>        | 1.13 (0.419)  | 1.06 (0.999)  |
| NM_011184                    | Proteasome (prosome, macropain) subunit, alpha type 3                                          | <i>Psm3</i>        | 1.01 (0.686)  | 1.03 (0.999)  |
| NM_011966                    | Proteasome (prosome, macropain) subunit, alpha type 4                                          | <i>Psm4</i>        | -1.10 (0.523) | 1.04 (0.999)  |
| NM_011967                    | Proteasome (prosome, macropain) subunit, alpha type 5                                          | <i>Psm5</i>        | 1.17 (0.398)  | 1.07 (0.999)  |
| NM_011968                    | Proteasome (prosome, macropain) subunit, alpha type 6                                          | <i>Psm6</i>        | 1.20 (0.234)  | -1.03 (0.999) |
| NM_011969                    | Proteasome (prosome, macropain) subunit, alpha type 7                                          | <i>Psm7</i>        | 1.10 (0.529)  | 1.05 (0.999)  |
| AK010717                     | Proteasome (prosome, macropain) subunit, alpha type 8                                          | <i>Psm8</i>        | -1.03 (0.647) | -1.05 (0.999) |
| NM_011185                    | Proteasome (prosome, macropain) subunit, beta type 1                                           | <i>Psm1</i>        | -1.03 (0.656) | 1.08 (0.999)  |
| NM_011970                    | Proteasome (prosome, macropain) subunit, beta type 2                                           | <i>Psm2</i>        | 1.06 (0.593)  | 1.05 (0.999)  |
| NM_011971                    | Proteasome (prosome, macropain) subunit, beta type 3                                           | <i>Psm3</i>        | -1.03 (0.662) | -1.06 (0.999) |

|                                         |                                                             |               |               |               |
|-----------------------------------------|-------------------------------------------------------------|---------------|---------------|---------------|
| NM_008945                               | Proteasome (prosome, macropain) subunit, beta type 4        | <i>Psmb4</i>  | 1.02 (0.602)  | -1.02 (0.999) |
| NM_011186                               | Proteasome (prosome, macropain) subunit, beta type 5        | <i>Psmb5</i>  | -1.06 (0.581) | -1.07 (0.999) |
| NM_008946                               | Proteasome (prosome, macropain) subunit, beta type 6        | <i>Psmb6</i>  | 1.30 (0.151)  | 1.08 (0.999)  |
| NM_011187                               | Proteasome (prosome, macropain) subunit, beta type 7        | <i>Psmb7</i>  | -1.03 (0.647) | 1.14 (0.999)  |
| NM_010724                               | Proteasome (prosome, macropain) subunit, beta type 8        | <i>Psmb8</i>  | -1.03 (0.647) | -1.05 (0.999) |
| NM_013585                               | Proteasome (prosome, macropain) subunit, beta type 9        | <i>Psmb9</i>  | 1.12 (0.562)  | -1.05 (0.999) |
| NM_013640                               | Proteasome (prosome, macropain) subunit, beta type 10       | <i>Psmb10</i> | 1.22 (0.370)  | 1.05 (0.999)  |
| NM_008947                               | Protease (prosome, macropain) 26S subunit, ATPase 1         | <i>Psmc1</i>  | -1.50 (0.051) | -1.04 (0.999) |
| NM_011188                               | Protease (prosome, macropain) 26S subunit, ATPase 2         | <i>Psmc2</i>  | 1.08 (0.552)  | 1.11 (0.999)  |
| NM_008948                               | Protease (prosome, macropain) 26S subunit, ATPase 3         | <i>Psmc3</i>  | 1.09 (0.484)  | 1.05 (0.999)  |
| NM_011874                               | Protease (prosome, macropain) 26S subunit, ATPase 4         | <i>Psmc4</i>  | -1.02 (0.656) | -1.08 (0.999) |
| NM_008950                               | Protease (prosome, macropain) 26S subunit, ATPase 5         | <i>Psmc5</i>  | -1.15 (0.379) | 1.03 (0.999)  |
| NM_025959                               | Protease (prosome, macropain) 26S subunit, ATPase 6         | <i>Psmc6</i>  | 1.06 (0.601)  | 1.08 (0.999)  |
| NM_027357                               | Proteasome (prosome, macropain) 26S subunit, non-ATPase, 1  | <i>Psmc1</i>  | 1.06 (0.353)  | -1.05 (0.999) |
| NM_134101                               | Proteasome (prosome, macropain) 26S subunit, non-ATPase, 2  | <i>Psmc2</i>  | 1.00 (0.999)  | 1.10 (0.700)  |
| NM_009439                               | Proteasome (prosome, macropain) 26S subunit, non-ATPase, 3  | <i>Psmc3</i>  | 1.06 (0.979)  | 1.02 (0.999)  |
| NM_008951                               | Proteasome (prosome, macropain) 26S subunit, non-ATPase, 4  | <i>Psmc4</i>  | 1.15 (0.368)  | -1.02 (0.999) |
| NM_080554                               | Proteasome (prosome, macropain) 26S subunit, non-ATPase, 5  | <i>Psmc5</i>  | 1.07 (0.537)  | 1.07 (0.999)  |
| NM_025550                               | Proteasome (prosome, macropain) 26S subunit, non-ATPase, 6  | <i>Psmc6</i>  | 1.05 (0.579)  | -1.01 (0.999) |
| NM_010817                               | Proteasome (prosome, macropain) 26S subunit, non-ATPase, 7  | <i>Psmc7</i>  | 1.02 (0.999)  | 1.06 (0.664)  |
| NM_026545                               | Proteasome (prosome, macropain) 26S subunit, non-ATPase, 8  | <i>Psmc8</i>  | 1.04 (0.628)  | -1.02 (0.999) |
| NM_026000                               | Proteasome (prosome, macropain) 26S subunit, non-ATPase, 9  | <i>Psmc9</i>  | 1.02 (0.999)  | -1.07 (0.941) |
| NM_016883                               | Proteasome (prosome, macropain) 26S subunit, non-ATPase, 10 | <i>Psmc10</i> | 1.05 (0.999)  | 1.11 (0.998)  |
| NM_178616                               | Proteasome (prosome, macropain) 26S subunit, non-ATPase, 11 | <i>Psmc11</i> | -1.04 (0.604) | -1.04 (0.999) |
| NM_025894                               | Proteasome (prosome, macropain) 26S subunit, non-ATPase, 12 | <i>Psmc12</i> | -1.04 (0.999) | 1.05 (0.999)  |
| NM_011875                               | Proteasome (prosome, macropain) 26S subunit, non-ATPase, 13 | <i>Psmc13</i> | 1.03 (0.999)  | 1.04 (0.999)  |
| NM_021526                               | Proteasome (prosome, macropain) 26S subunit, non-ATPase, 14 | <i>Psmc14</i> | -1.07 (0.999) | -1.07 (0.999) |
| NM_011189                               | Proteasome (prosome, macropain) 28S subunit, alpha          | <i>Psmc1</i>  | 1.27 (0.187)  | 1.04 (0.999)  |
| NM_011192                               | Proteasome (prosome, macropain) 28S subunit, 3              | <i>Psmc3</i>  | -1.22 (0.380) | 1.00 (0.999)  |
| NM_134013                               | Proteasome (prosome, macropain) 28S subunit, 4              | <i>Psmc4</i>  | 1.06 (0.350)  | 1.05 (0.999)  |
| NM_212446                               | Proteasome (prosome, macropain) inhibitor subunit 1         | <i>Psmf1</i>  | -1.17 (0.382) | -1.05 (0.999) |
|                                         |                                                             |               |               |               |
|                                         |                                                             |               |               |               |
| <b>Individual molecular chaperones:</b> |                                                             |               |               |               |
| NCBI                                    | Gene Name                                                   | Gene Symbol   |               |               |
|                                         |                                                             |               |               |               |
| NM_008298                               | DnaJ (Hsp40) homolog, subfamily A, member 1                 | <i>Dnaja1</i> | 1.09 (0.662)  | -1.06 (0.999) |
| NM_019794                               | DnaJ (Hsp40) homolog, subfamily A, member 2                 | <i>Dnaja2</i> | 1.04 (0.999)  | -1.12 (0.746) |
| NM_023646                               | DnaJ (Hsp40) homolog, subfamily A, member 3                 | <i>Dnaja3</i> | -1.25 (0.275) | 1.01 (0.999)  |

|              |                                                   |                         |               |               |
|--------------|---------------------------------------------------|-------------------------|---------------|---------------|
| NM_021422    | DnaJ (Hsp40) homolog, subfamily A, member 4       | <i>Dnaja4</i>           | -1.24 (0.427) | -1.53 (0.973) |
| NM_018808    | DnaJ (Hsp40) homolog, subfamily B, member 1       | <i>Dnajb1</i>           | -1.33 (0.319) | -1.65 (0.855) |
| NM_008299    | DnaJ (Hsp40) homolog, subfamily B, member 3       | <i>Dnajb3</i>           | 1.08 (0.930)  | -1.07 (0.999) |
| NM_025926    | DnaJ (Hsp40) homolog, subfamily B, member 4       | <i>Dnajb4</i>           | 1.11 (0.778)  | -1.08 (0.999) |
| NM_019874    | DnaJ (Hsp40) homolog, subfamily B, member 5       | <i>Dnajb5</i>           | -1.10 (0.934) | -1.20 (0.942) |
| NM_001037940 | DnaJ (Hsp40) homolog, subfamily B, member 6       | <i>Dnajb6</i>           | -1.09 (0.918) | 1.13 (0.927)  |
| NM_021317    | DnaJ (Hsp40) homolog, subfamily B, member 7       | <i>Dnajb7</i>           | -1.02 (0.847) | 1.04 (0.999)  |
| NM_019964    | DnaJ (Hsp40) homolog, subfamily B, member 8       | <i>Dnajb8</i>           | 1.03 (0.999)  | -1.18 (0.963) |
| NM_013760    | DnaJ (Hsp40) homolog, subfamily B, member 9       | <i>Dnajb9</i>           | -1.08 (0.557) | 1.03 (0.999)  |
| NM_020266    | DnaJ (Hsp40) homolog, subfamily B, member 10      | <i>Dnajb10</i>          | -1.63 (0.081) | -1.35 (0.734) |
| NM_026400    | DnaJ (Hsp40) homolog, subfamily B, member 11      | <i>Dnajb11</i>          | 1.06 (0.954)  | 1.12 (0.999)  |
| NM_019965    | DnaJ (Hsp40) homolog, subfamily B, member 12      | <i>Dnajb12</i>          | 1.06 (0.895)  | -1.02 (0.999) |
| NM_007869    | DnaJ (Hsp40) homolog, subfamily C, member 1       | <i>Dnajc1</i>           | -1.11 (0.936) | 1.15 (0.999)  |
| NM_009584    | DnaJ (Hsp40) homolog, subfamily C, member 2       | <i>Dnajc2</i>           | -1.03 (0.941) | 1.06 (0.999)  |
| NM_008929    | DnaJ (Hsp40) homolog, subfamily C, member 3B      | <i>Dnajc3a (p58IPK)</i> | 1.16 (0.824)  | 1.27 (0.810)  |
| NM_020566    | DnaJ (Hsp40) homolog, subfamily C, member 4       | <i>Dnajc4</i>           | -1.20 (0.221) | -1.12 (0.999) |
| NM_016775    | DnaJ (Hsp40) homolog, subfamily C, member 5       | <i>Dnajc5</i>           | 1.07 (0.999)  | 1.00 (0.999)  |
| NM_025489    | DnaJ (Hsp40) homolog, subfamily C, member 5 beta  | <i>Dnajc5b</i>          | -1.02 (0.471) | -1.07 (0.491) |
| NM_177677    | DnaJ (Hsp40) homolog, subfamily C, member 5 gamma | <i>Dnajc5g</i>          | -1.08 (0.524) | 1.06 (0.999)  |
| NM_198412    | DnaJ (Hsp40) homolog, subfamily C, member 6       | <i>Dnajc6</i>           | 1.03 (0.983)  | 1.01 (0.999)  |
| NM_019795    | DnaJ (Hsp40) homolog, subfamily C, member 7       | <i>Dnajc7</i>           | -1.17 (0.944) | 1.07 (0.999)  |
| NM_172400    | DnaJ (Hsp40) homolog, subfamily C, member 8       | <i>Dnajc8</i>           | 1.06 (0.964)  | 1.05 (0.999)  |
| NM_134081    | DnaJ (Hsp40) homolog, subfamily C, member 9       | <i>Dnajc9</i>           | -1.07 (0.977) | 1.25 (0.763)  |
| NM_024181    | DnaJ (Hsp40) homolog, subfamily C, member 10      | <i>Dnajc10</i>          | 1.06 (0.863)  | 1.02 (0.999)  |
| NM_172704    | DnaJ (Hsp40) homolog, subfamily C, member 11      | <i>Dnajc11</i>          | -1.15 (0.698) | 1.01 (0.999)  |
| NM_013888    | DnaJ (Hsp40) homolog, subfamily C, member 12      | <i>Dnajc12</i>          | 1.01 (0.866)  | -1.05 (0.999) |
| NM_001163026 | DnaJ (Hsp40) homolog, subfamily C, member 13      | <i>Dnajc13</i>          | 1.11 (0.591)  | 1.08 (0.999)  |
| NM_028873    | DnaJ (Hsp40) homolog, subfamily C, member 14      | <i>Dnajc14</i>          | 1.28 (0.523)  | 1.26 (0.734)  |
| NM_025384    | DnaJ (Hsp40) homolog, subfamily C, member 15      | <i>Dnajc15</i>          | -1.12 (0.897) | -1.11 (0.943) |
| NM_172338    | DnaJ (Hsp40) homolog, subfamily C, member 16      | <i>Dnajc16</i>          | 1.01 (0.999)  | 1.02 (0.999)  |
| NM_139139    | DnaJ (Hsp40) homolog, subfamily C, member 17      | <i>Dnajc17</i>          | -1.05 (0.993) | -1.03 (0.999) |
| NM_029669    | DnaJ (Hsp40) homolog, subfamily C, member 18      | <i>Dnajc18</i>          | 1.09 (0.832)  | 1.12 (0.999)  |
| NM_026332    | DnaJ (Hsp40) homolog, subfamily C, member 19      | <i>Dnajc19</i>          | -1.13 (0.537) | 1.11 (0.999)  |
| NM_010479    | Heat shock protein 1A                             | <i>Hspa1a</i>           | -1.24 (0.793) | -1.05 (0.999) |
| NM_013558    | Heat shock protein 1-like                         | <i>Hspa1l</i>           | -1.03 (0.999) | -1.10 (0.954) |
| NM_008301    | Heat shock protein 2                              | <i>Hspa2</i>            | 1.02 (0.999)  | -1.46 (0.681) |
| NM_008300    | Heat shock protein 4                              | <i>Hspa4</i>            | -1.03 (0.999) | -1.10 (0.954) |
| NM_011020    | Heat shock protein 4 like                         | <i>Hspa4l</i>           | 1.60 (0.062)  | 1.03 (0.999)  |
| NM_022310    | Heat shock protein 5                              | <i>Hspa5</i>            | 1.17 (0.499)  | 1.11 (0.999)  |

|                         |                                                              |                        |               |               |
|-------------------------|--------------------------------------------------------------|------------------------|---------------|---------------|
| NM_031165               | Heat shock protein 8                                         | <i>Hspa8</i>           | -1.04 (0.999) | -1.16 (0.976) |
| NM_010481               | Heat shock protein 9                                         | <i>Hspa9</i>           | -1.10 (0.684) | 1.05 (0.999)  |
| NM_175199               | Heat shock protein 12A                                       | <i>Hspa12a</i>         | 1.02 (0.963)  | -1.07 (0.999) |
| NM_028306               | Heat shock protein 12B                                       | <i>Hspa12b</i>         | 1.39 (0.291)  | -1.02 (0.999) |
| NM_015765               | Heat shock protein 14                                        | <i>Hspa14</i>          | 1.00 (0.999)  | 1.12 (0.999)  |
| NM_013560               | Heat shock protein 1                                         | <i>Hspb1</i>           | 1.06 (0.954)  | -1.06 (0.999) |
| NM_024441               | Heat shock protein 2                                         | <i>Hspb2</i>           | -1.01 (0.999) | -1.28 (0.690) |
| NM_019960               | Heat shock protein 3                                         | <i>Hspb3</i>           | -1.66 (0.188) | 1.21 (0.861)  |
| NM_001012401            | Heat shock protein, alpha-crystallin-related, B6             | <i>Hspb6</i>           | -1.28 (0.489) | 1.00 (0.999)  |
| NM_013868               | Heat shock protein family, member 7 (cardiovascular)         | <i>Hspb7</i>           | 1.13 (0.852)  | -1.02 (0.999) |
| NM_030704               | Heat shock protein 8 (Hspb8)                                 | <i>Hspb8</i>           | 1.07 (0.999)  | -1.32 (0.818) |
| NM_175111               | Hspb associated protein 1                                    | <i>Hspbap1</i>         | -1.14 (0.523) | -1.05 (0.999) |
| NM_025486               | Heat shock protein c171                                      | <i>Hspc171</i>         | -1.02 (0.999) | -1.01 (0.999) |
| NM_010477               | Heat shock protein 1 (chaperonin)                            | <i>Hspd1</i>           | -1.14 (0.304) | -1.06 (0.999) |
| NM_010480               | Heat shock protein 90kDa alpha (cytosolic), class A member 1 | <i>Hsp90aa1</i>        | -1.04 (0.986) | -1.05 (0.999) |
| NM_008302               | Heat shock protein 90kDa alpha (cytosolic), class B member 1 | <i>Hsp90ab1</i>        | 1.10 (0.529)  | -1.06 (0.999) |
| NM_011631               | Heat shock protein 90kDa beta (Grp94), member 1              | <i>Hsp90b1 (Grp94)</i> | 1.26 (0.721)  | 1.26 (0.902)  |
| NM_013559               | Heat shock protein 110                                       | <i>Hsp110</i>          | -1.36 (0.328) | -1.19 (0.997) |
|                         |                                                              |                        |               |               |
|                         |                                                              |                        |               |               |
|                         |                                                              |                        |               |               |
| <b>Cartilage genes:</b> |                                                              |                        |               |               |
| NCBI                    | Gene Name                                                    | <i>Gene Symbol</i>     |               |               |
|                         |                                                              |                        |               |               |
| NM_007424               | Aggrecan                                                     | <i>Aqc1</i>            | 1.00 (0.999)  | -1.12 (0.993) |
| NM_007614               | Catenin (cadherin associated protein), beta 1                | <i>Ctnnb1</i>          | 1.21 (0.725)  | 1.14 (0.999)  |
| NM_031163               | Collagen, type II, alpha 1                                   | <i>Col2a1</i>          | -1.03 (0.999) | 1.02 (0.999)  |
| NM_009933               | Collagen, type VI, alpha 1                                   | <i>Col6a1</i>          | 1.19 (0.671)  | -1.03 (0.999) |
| NM_146007               | Collagen, type VI, alpha 2                                   | <i>Col6a2</i>          | 1.44 (0.224)  | -1.02 (0.999) |
| XM_897036               | Collagen, type VI, alpha 3                                   | <i>Col6a3</i>          | 1.35 (0.129)  | -1.02 (0.999) |
| NM_007739               | Collagen, type VIII, alpha 1                                 | <i>Col8a1</i>          | 1.65 (0.366)  | 1.32 (0.999)  |
| NM_199473               | Collagen, type VIII, alpha 2                                 | <i>Col8a2</i>          | 1.52 (0.354)  | 1.82 (0.635)  |
| NM_007740               | Collagen, type IX, alpha 1                                   | <i>Col9a1</i>          | -1.02 (0.999) | 1.05 (0.999)  |
| NM_007741               | Collagen, type IX, alpha 2                                   | <i>Col9a2</i>          | -1.42 (0.316) | 1.00 (0.999)  |
| NM_009936               | Collagen, type IX, alpha 3                                   | <i>Col9a3</i>          | -1.24 (0.573) | -1.06 (0.999) |
| NM_007729               | Collagen, type XI, alpha 1                                   | <i>Col11a1</i>         | -1.01 (0.999) | 1.03 (0.999)  |
| NM_009926               | Collagen, type XI, alpha 2                                   | <i>Col11a2</i>         | -1.12 (0.628) | 1.04 (0.999)  |
| NM_016685               | Cartilage oligomeric matrix protein                          | <i>Comp</i>            | 1.06 (0.999)  | 1.01 (0.999)  |
| NM_010217               | Connective tissue growth factor                              | <i>Ctgf</i>            | 1.30 (0.360)  | -1.04 (0.999) |

|                                                  |                                                                    |                    |               |               |
|--------------------------------------------------|--------------------------------------------------------------------|--------------------|---------------|---------------|
| NM_010056                                        | Distal-less homeobox 5                                             | <i>Dlx5</i>        | 1.12 (0.622)  | 1.03 (0.999)  |
| NM_008005                                        | Fibroblast growth factor 18                                        | <i>Fgf18</i>       | 2.44 (0.005)  | -1.33 (0.974) |
| NM_008010                                        | Fibroblast growth factor receptor 3                                | <i>Fgfr3</i>       | -1.13 (0.952) | 1.04 (0.999)  |
| NM_013500                                        | Hyaluronan and proteoglycan link protein 1                         | <i>Hapln1</i>      | 1.03 (0.999)  | -1.06 (0.999) |
| NM_010544                                        | Indian hedgehog                                                    | <i>Ihh</i>         | -1.03 (0.992) | -1.09 (0.999) |
| NM_010769                                        | Matrilin 1                                                         | <i>Matn1</i>       | 1.49 (0.663)  | -1.39 (0.828) |
| NM_016762                                        | Matrilin 2                                                         | <i>Matn2</i>       | 1.36 (0.711)  | 1.19 (0.999)  |
| NM_010770                                        | Matrilin 3                                                         | <i>Matn3</i>       | -1.09 (0.962) | -1.02 (0.999) |
| NM_013592                                        | Matrilin 4                                                         | <i>Matn4</i>       | 1.04 (0.999)  | 1.11 (0.999)  |
| NM_008970                                        | Parathyroid hormone-like peptide                                   | <i>Pthlh</i>       | 1.85 (0.055)  | -1.01 (0.999) |
| NM_011199                                        | Parathyroid hormone 1 receptor                                     | <i>Pthr1</i>       | -1.19 (0.413) | -1.01 (0.999) |
| NM_022017                                        | Transient receptor potential cation channel, subfamily V, member 4 | <i>Trpv4</i>       | -1.08 (0.979) | -1.23 (0.957) |
| <b><i>Hypertrophic cartilage genes:</i></b>      |                                                                    |                    |               |               |
| NM_007431                                        | Alkaline phosphatase, liver/bone/kidney                            | <i>Akp2</i>        | 1.81 (0.333)  | -1.14 (0.999) |
| NM_009925                                        | Collagen, type X, alpha 1                                          | <i>Col10a1</i>     | 1.01 (0.999)  | -1.49 (0.801) |
| NM_013599                                        | Matrix metalloproteinase 9                                         | <i>Mmp9</i>        | 1.15 (0.835)  | 1.00 (0.999)  |
| NM_008607                                        | Matrix metalloproteinase 13                                        | <i>Mmp13</i>       | 1.50 (0.398)  | 1.53 (0.734)  |
| NM_008608                                        | Matrix metalloproteinase 14                                        | <i>Mmp14</i>       | 1.60 (0.493)  | 1.14 (0.999)  |
| NM_009263                                        | Secreted phosphoprotein 1                                          | <i>Spp1</i>        | 1.89 (0.070)  | 1.67 (0.970)  |
| NM_009820                                        | Runt related transcription factor 2                                | <i>Runx2</i>       | 1.18 (0.510)  | 1.05 (0.999)  |
| <b><i>Classical apoptosis related genes:</i></b> |                                                                    |                    |               |               |
| NCBI                                             | Gene Name                                                          | <i>Gene Symbol</i> |               |               |
| NM_007527                                        | Bcl2-associated X protein                                          | <i>Bax</i>         | 1.23 (0.523)  | -1.04 (0.999) |
| NM_009741                                        | B-cell leukemia/lymphoma 2                                         | <i>Bcl2</i>        | -1.13 (0.943) | 1.01 (0.999)  |
| NM_009808                                        | Caspase 12                                                         | <i>Casp12</i>      | 1.43 (0.779)  | 1.46 (0.987)  |
| NM_009810                                        | Caspase 3                                                          | <i>Casp3</i>       | 1.03 (0.949)  | 1.04 (0.999)  |
| NM_007611                                        | Caspase 7                                                          | <i>Casp7</i>       | 1.32 (0.222)  | 1.06 (0.999)  |
| NM_015733                                        | Caspase 9                                                          | <i>Casp9</i>       | -1.08 (0.994) | -1.05 (0.999) |
| NM_007837                                        | DNA damage inducible transcript 3                                  | <i>Ddit3</i>       | -1.19 (0.368) | 1.16 (0.999)  |
| NM_015774                                        | ERO1-like (S. cerevisiae)                                          | <i>Ero1l</i>       | 1.18 (0.963)  | -1.03 (0.999) |
| NM_026184                                        | ERO1-like beta (S. cerevisiae)                                     | <i>Ero1lb</i>      | 1.01 (0.999)  | -1.01 (0.999) |
| NM_146120                                        | Gelsolin                                                           | <i>Gsn</i>         | 1.05 (0.906)  | -1.11 (0.999) |
| NM_010705                                        | Lectin, galactose binding, soluble 3                               | <i>Lgals3</i>      | 1.10 (0.665)  | 1.00 (0.999)  |
| NM_008580                                        | Mitogen-activated protein kinase kinase kinase 5                   | <i>Map3k5</i>      | -1.15 (0.505) | -1.01 (0.999) |
| NM_016700                                        | Mitogen-activated protein kinase 8                                 | <i>Mapk8</i>       | 1.15 (0.687)  | -1.03 (0.999) |

|           |                                                                                |                 |               |               |
|-----------|--------------------------------------------------------------------------------|-----------------|---------------|---------------|
| NM_008689 | Nuclear factor of kappa light polypeptide gene enhancer in B-cells 1, p105     | <i>Nfkb1</i>    | -1.92 (0.138) | -1.17 (0.999) |
| NM_019408 | Nuclear factor of kappa light polypeptide gene enhancer in B-cells 2, p49/p100 | <i>Nfkb2</i>    | -1.47 (0.308) | -1.17 (0.999) |
| NM_008654 | Protein phosphatase 1, regulatory (inhibitor) subunit 15A                      | <i>Ppp1r15a</i> | -1.16 (0.442) | -1.19 (0.999) |
| NM_009422 | TNF receptor-associated factor 2                                               | <i>Traf2</i>    | -1.25 (0.301) | 1.07 (0.999)  |
| NM_175093 | Tribbles homolog 3 (Drosophila)                                                | <i>Trib3</i>    | -1.40 (0.498) | 1.27 (0.907)  |
| NM_207680 | Bcl2-like 11 (apoptosis facilitator)                                           | <i>Bcl2l11</i>  | 1.30 (0.597)  | -1.14 (0.999) |
| NM_133234 | Bcl2 binding component 3                                                       | <i>Bbc3</i>     | -1.19 (0.914) | -1.08 (0.999) |
| NM_026929 | Chac, cation transport-like regulator 1 (E.coli)                               | <i>Chac1</i>    | -1.51 (0.247) | 1.26 (0.999)  |
| NM_019816 | Apoptosis antagonizing transcription factor                                    | <i>Aatf</i>     | -1.08 (0.902) | 1.07 (0.999)  |
| NM_213659 | Signal transducer and activator of transcription 3                             | <i>Stat3</i>    | -1.13 (0.853) | 1.08 (0.999)  |
| NM_011716 | Wolfram syndrome 1 homolog (human)                                             | <i>Wfs1</i>     | -1.21 (0.414) | -1.04 (0.999) |
| NM_009652 | Thymoma viral proto-oncogene 1                                                 | <i>Akt1</i>     | 1.01 (0.690)  | 1.02 (0.999)  |



**Supp. Table S2. The fold change in the relative expression levels of selected conventional UPR and/or ERAD genes in heterozygous *Comp* p.D469del mice and *COMP* p.D469del cell culture model**

RNA was isolated the rib chondrocytes of 5 day-old wild-type and mutant mice (*Comp* p.D469del<sup>m/m</sup> and *Comp* p.D469del<sup>wt/mut</sup>) or HT1080 cells stably transfected with control or *COMP* p.D469del cDNA (cells were harvested 48 hrs post confluence). The relative expression levels of various UPR associated genes calculated using the PUMA method are shown with the significance value given in parentheses. Highlighted in yellow are values that reach a statistically significance difference compared to wild-type (i.e. P>0.95 for up regulated genes and P<0.05 for down regulated genes). The gene order and categorization of the genes is based on that published by Cameron et al PLoS ONE (*in press*).

| <b>Classical endoplasmic reticulum stress receptors and targets</b> |                                                           |             |                    |                  |
|---------------------------------------------------------------------|-----------------------------------------------------------|-------------|--------------------|------------------|
| NCBI designation                                                    | Gene Name                                                 | Gene Symbol | D469del wt/m<br>5D | D469del<br>cells |
| NM_023913                                                           | Endoplasmic reticulum to nucleus signalling 1             | Ern1        | 1.21 (0.436)       | -1.06 (0.549)    |
| NM_010121                                                           | Eukaryotic translation initiation factor 2 alpha kinase 3 | Eif2ak3     | 2.44 (0.593)       | 6.22 (0.540)     |
| NM_007837                                                           | DNA-damage inducible transcript 3                         | Ddit3       | -1.73 (0.003)      | 1.30 (0.690)     |
| NM_022310                                                           | Heat shock protein 5                                      | Hspa5/BiP*  | -1.56 (0.122)      | 1.42 (0.953)     |
| NM_013842                                                           | X-box binding protein 1                                   | Xbp1        | -1.11 (0.333)      | 1.21 (0.982)     |
| <b>Selected genes involved with a classical UPR and/or ERAD</b>     |                                                           |             |                    |                  |
| NCBI designation                                                    | Gene Name                                                 | Gene Symbol |                    |                  |
| NM_007597                                                           | Calnexin                                                  | Canx        | -1.06 (0.348)      | 1.22 (0.847)     |
| NM_007591                                                           | Calreticulin                                              | Calr*       | -1.08 (2.7E-3)     | 1.47 (0.920)     |
| NM_024207                                                           | Der1-like domain family, member 1 (Derlin 1)              | Derl1       | 1.11 (0.693)       | 1.16 (0.773)     |
| NM_033562                                                           | Der1-like domain family, member 2 (Derlin 2)              | Derl2       | 1.07 (0.614)       | 1.39 (0.927)     |
| NM_024440                                                           | Der1-like domain family, member 3 (Derlin 3)              | Derl3       | -1.53 (0.269)      | 2.27 (0.762)     |
| NM_021422                                                           | DnaJ (Hsp40) homolog, subfamily A, member 4               | Dnaja4      | -2.02 (0.011)      | -2.09 (0.288)    |
| NM_019964                                                           | DnaJ (Hsp40) homolog, subfamily B, member 8               | Dnajb8      | -1.13 (0.448)      | -1.77 (0.190)    |
| NM_013760                                                           | DnaJ (Hsp40) homolog, subfamily B, member 9               | Dnajb9      | -1.11 (0.287)      | -1.10 (0.352)    |
| NM_020266                                                           | DnaJ (Hsp40) homolog, subfamily B, member 10              | Dnajb10     | -1.19 (0.094)      | -1.78 (0.148)    |
| NM_019965                                                           | DnaJ (Hsp40) homolog, subfamily B, member 12              | Dnajb12     | 1.38 (0.908)       | -1.05 (0.487)    |
| NM_007869                                                           | DnaJ (Hsp40) homolog, subfamily C, member 1               | Dnajc1      | -1.11 (0.313)      | 1.07 (0.659)     |
| NM_020566                                                           | DnaJ (Hsp40) homolog, subfamily C, member 4               | Dnajc4      | 1.18 (0.707)       | -1.31 (0.352)    |
| NM_025489                                                           | DnaJ (Hsp40) homolog, subfamily C, member 5 beta          | Dnajc5b     | 2.00 (0.801)       | 1.56 (0.699)     |
| NM_019795                                                           | DnaJ (Hsp40) homolog, subfamily C, member 7               | Dnajc7      | 1.10 (0.716)       | 1.18 (0.736)     |
| NM_013888                                                           | DnaJ (Hsp40) homolog, subfamily C, member 12              | Dnajc12     | 1.00 (0.505)       | -5.90 (0.235)    |
| NM_025384                                                           | DnaJ (Hsp40) homolog, subfamily C, member 15              | Dnajc15     | 1.32 (0.997)       | 1.19 (0.813)     |
| NM_138677                                                           | ER degradation enhancer, mannosidase alpha-like 1         | Edem1       | 1.28 (0.874)       | -1.07 (0.384)    |
| NM_145537                                                           | ER degradation enhancer, mannosidase alpha-like 2         | Edem2       | -2.09 (0.376)      | -1.07 (0.328)    |
| NM_001039644                                                        | ER degradation enhancer, mannosidase alpha-like 3         | Edem3       | 1.18 (0.737)       | 1.19 (0.185)     |

|           |                                                                                                |                 |                 |               |
|-----------|------------------------------------------------------------------------------------------------|-----------------|-----------------|---------------|
| NM_022331 | Homocysteine-inducible, endoplasmic reticulum stress-inducible, ubiquitin-like domain member 1 | Herpud1         | -1.17 (0.140)   | 1.48 (0.999)  |
| NM_020586 | Homocysteine-inducible, endoplasmic reticulum stress-inducible, ubiquitin-like domain member 2 | Herpud2         | 1.25 (0.438)    | -1.03 (0.447) |
| NM_013558 | Heat shock protein 1-like                                                                      | Hspa1l          | 1.30 (0.602)    | 1.20 (0.550)  |
| NM_011020 | Heat shock protein 4 like                                                                      | Hspa4l          | -1.19 (0.365)   | 4.12 (1)      |
| NM_015765 | Heat shock protein 14                                                                          | Hspa14          | -1.13 (0.401)   | 1.64 (0.998)  |
| NM_013560 | Heat shock protein 1                                                                           | Hspb1           | -1.75 (5.1E-05) | -2.54 (0.336) |
| NM_019960 | Heat shock protein 3                                                                           | Hspb3           | -1.86 (0.298)   | 1.20 (0.533)  |
| NM_025486 | Heat shock protein c171                                                                        | Hspc171         | -1.12 (0.205)   | 1.20 (0.828)  |
| NM_011631 | Heat shock protein 90kDa beta (Grp94), member 1                                                | Hsp90b1 (Grp94) | -1.52 (4.9E-3)  | -1.96 (0.517) |
| NM_029103 | Mesencephalic astrocyte-derived neurotrophic factor                                            | Manf/Armet      | -1.33 (0.011)   | 1.14 (0.859)  |
| NM_007952 | Protein disulphide isomerase associated 3                                                      | Pdia3           | -1.03 (0.475)   | -1.21 (0.250) |
| NM_009787 | Protein disulphide isomerase associated 4                                                      | Pdia4           | -1.27 (0.073)   | -1.18 (0.267) |
| NM_028295 | Protein disulphide isomerase associated 5                                                      | Pdia5           | -1.14 (0.246)   | 1.15 (0.734)  |
| NM_027959 | Protein disulphide isomerase associated 6                                                      | Pdia6           | -1.27 (0.171)   | 1.14 (0.862)  |

**Supp. Table S3. The top 20 most significantly up regulated genes in chondrocytes from new born *Comp* p.D469del<sup>m/m</sup> mutant mice relative to wild type**

| Gene ID   | Gene Name                                                             | Gene Symbol                    | Fold change | Putative role in PSACH pathology                                                                                                                                                                                                                                                                                                                                                                |
|-----------|-----------------------------------------------------------------------|--------------------------------|-------------|-------------------------------------------------------------------------------------------------------------------------------------------------------------------------------------------------------------------------------------------------------------------------------------------------------------------------------------------------------------------------------------------------|
| AV175389  | Insulin-like growth factor binding protein 3                          | <i>Igfbp3</i>                  | 12.19       | IGFBP3 induces <b>rapid apoptosis</b> in a non-IGF-dependant manner and has <b>anti-proliferative effects</b> via transforming growth factor $\beta$ (TGF- $\beta$ ) signalling pathway.                                                                                                                                                                                                        |
| NM_008438 | Keratocan                                                             | <i>Kera</i>                    | 11.00       | An ECM protein and member of the SLRPs. Plays a role in regulating cellular processes such as <b>proliferation</b> and modulation of osteoprogenitor lineage differentiation.                                                                                                                                                                                                                   |
| NM_008218 | Hemoglobin alpha, adult chain 1 and 2                                 | <i>Hba-a1</i><br><i>Hba-a2</i> | 10.11       | Involved in oxygen transport from the lung to various peripheral tissues.                                                                                                                                                                                                                                                                                                                       |
| L20232    | Integrin binding sialoprotein                                         | <i>Ibsp</i>                    | 9.97        | A member of the small integrin-binding ligand N-linked glycoprotein (SIBLING) family. Binds tightly to hydroxyapatite and appears to form an integral part of the mineralized matrix. Important for cell-matrix interactions and directly promotes Arg-Gly-Asp-dependent <b>cell attachment</b> (see also <i>Egfl6</i> ).                                                                       |
| BG791642  | ATP-binding cassette, sub-family C (CFTR/MRP), member 9               | <i>Abcc9</i>                   | 9.25        | Subunit of ATP-sensitive potassium channels (KATP). Mitochondrial ATP-sensitive potassium channels can <b>inhibit apoptosis</b> induced by <b>oxidative stress</b> .                                                                                                                                                                                                                            |
| BE630003  | Cartilage intermediate layer protein, nucleotide pyrophosphohydrolase | <i>Cilp</i>                    | 9.17        | <i>Cilp</i> has the ability to suppress IGF1-induced <b>proliferation</b> and sulfated proteoglycan synthesis and inhibits ligand-induced IGF1R auto phosphorylation. May inhibit TGFB1-mediated induction of cartilage matrix genes via its interaction with TGFB1. Over expression may <b>impair chondrocyte growth</b> and matrix repair.                                                    |
| BG970109  | Laminin B1 subunit 1                                                  | <i>Lamb1-1</i>                 | 9.05        | Binding to cells via a high affinity receptor, laminin is thought to mediate the attachment, migration and organization of cells into tissues during embryonic development by interacting with other extracellular matrix components. Cell surface expression induces <b>apoptosis</b> .                                                                                                        |
| AF311699  | Chondrolectin                                                         | <i>Chodl</i>                   | 8.65        | Important for <b>cell migration</b> and cell-cell interactions.                                                                                                                                                                                                                                                                                                                                 |
| BE197945  | Serum deprivation response                                            | <i>Sdpr</i>                    | 8.51        | May play a role in regulation of <b>cell proliferation</b> and <i>Sdpr</i> induction appears to be coupled to <b>growth arrest</b> . SDPR is a substrate for protein kinase C (PKC) phosphorylation.                                                                                                                                                                                            |
| AK004781  | SRY-box containing gene 17                                            | <i>Sox17</i>                   | 8.15        | <i>Sox17</i> is a transcription factor that regulates <b>cell cycle</b> and <b>proliferation</b> .                                                                                                                                                                                                                                                                                              |
| BB039247  | CD93 antigen                                                          | <i>Cd93</i>                    | 8.13        | CD93 antigen plays a role in intercellular adhesion and in clearance of <b>apoptotic cells</b> .                                                                                                                                                                                                                                                                                                |
| BG917242  | Lipoma HMGIC fusion partner-like 2                                    | <i>Lhfp12</i>                  | 8.10        | A member of the lipoma HMGIC fusion partner (LHFP) gene family, which is a subset of the superfamily of tetraspan transmembrane protein encoding genes.                                                                                                                                                                                                                                         |
| NM_133654 | CD34 antigen                                                          | <i>Cd34</i>                    | 7.90        | Possible adhesion molecule with a role in early hematopoiesis by mediating the attachment of stem cells to the bone marrow extracellular matrix or directly to stromal cells. Could act as a scaffold for the attachment of lineage specific glycans, allowing stem cells to bind to lectins expressed by stromal cells or other marrow components. Presents carbohydrate ligands to selectins. |
| BF100813  | Endothelin receptor type B                                            | <i>Ednrb</i>                   | 7.10        | Non-specific receptor for endothelin 1, 2, and 3. <i>Ednrb</i> <sup>-/-</sup> mice exhibit neurodegeneration suggesting <i>Ednrb</i> is important for <b>cell survival</b> ; however this did not involve canonical <b>apoptosis signals</b> .                                                                                                                                                  |
| NM_011582 | Thrombospondin 4                                                      | <i>Thbs4</i>                   | 7.01        | Adhesive glycoprotein that mediates cell-to-cell and cell-to-matrix interactions. C-terminal peptide can stimulate <b>cell proliferation</b> .                                                                                                                                                                                                                                                  |
| NM_133736 | Regulator of G-protein signaling 5                                    | <i>Rgs5</i>                    | 6.92        | Inhibits signal transduction and acts as a hypoxia-inducible <b>apoptotic</b> stimulator. Plays a role in mediating responses to <b>oxidative stress</b> through the MEK-ERK1/2 signalling pathway.                                                                                                                                                                                             |
| AW543698  | Cadherin 5                                                            | <i>Cdh5</i>                    | 6.70        | A calcium-dependent cell-cell adhesion glycoprotein that plays an important role in <b>cell polarity</b> through control of the cohesion and organization of the intercellular junctions. It associates with alpha-catenin forming a link to the cytoskeleton. <b>Oxidative stress</b> can modulate Wnt/b-catenin and CDH5 in diabetes.                                                         |
| BC002076  | Mesenchyme homeobox 2                                                 | <i>Meox2</i>                   | 6.69        | MEOX2 (mesodermal homeobox-2) also known as GAX (Growth Arrest-specific homeoboX) encodes a homeodomain-containing transcription factor that regulates NF- $\kappa$ B activity and induces cell cycle arrest. Interaction between NF- $\kappa$ B complex and MEOX2 through its homeodomain and N-terminal                                                                                       |

|           |                             |              |      |                                                                                                                                                                                                       |
|-----------|-----------------------------|--------------|------|-------------------------------------------------------------------------------------------------------------------------------------------------------------------------------------------------------|
|           |                             |              |      | domain.                                                                                                                                                                                               |
| BC020152  | Integrin, beta-like 1       | <i>Itgb1</i> | 6.62 | Proposed to participate in cell adhesion, cell-matrix interactions and integrin-mediated signalling pathways. Along with <i>Gpha2</i> it is up regulated by dexamethasone of murine cochlear explants |
| NM_019397 | EGF-like-domain, multiple 6 | <i>Egfl6</i> | 6.55 | Mediates a paracrine mechanism of cross-talk between vascular endothelial cells and osteoblasts, promoting <b>cell migration</b> and angiogenesis during bone development, grow and repair.           |

**Supp. Table S4. The top 20 most significantly down regulated genes in chondrocytes from new born *Comp* p.D469del<sup>m/m</sup> mutant mice relative to wild type**

| Gene ID   | Gene Name                                                       | Gene Symbol   | Fold change | Putative role in PSACH pathology                                                                                                                                                                                                                                                                                                      |
|-----------|-----------------------------------------------------------------|---------------|-------------|---------------------------------------------------------------------------------------------------------------------------------------------------------------------------------------------------------------------------------------------------------------------------------------------------------------------------------------|
| NM_010743 | Interleukin 1 receptor-like 1                                   | <i>Il1rl1</i> | -6.09       | Receptor for interleukin-33 (IL-33). Possibly involved in helper T-cell function.                                                                                                                                                                                                                                                     |
| NM_013653 | Chemokine (C-C motif) ligand 5                                  | <i>Ccl5</i>   | -4.56       | Chemoattractant for blood monocytes and induces <b>cell proliferation</b> . Involved in the <b>NF-kappa-B</b> signalling cascade.                                                                                                                                                                                                     |
| AV347903  | Guanine nucleotide binding protein (G protein), gamma 4 subunit | <i>Gng4</i>   | -3.91       | Involved as a modulator or transducer in various transmembrane <b>signalling</b> systems.                                                                                                                                                                                                                                             |
| AF065917  | Leukemia inhibitory factor                                      | <i>Lif</i>    | -3.90       | Cytokine of the interleukin 6 superfamily that can activate the gp130-JAK-STAT3 signalling cascade and WNT5a signalling that enhances <b>cell proliferation</b> .                                                                                                                                                                     |
| AK011963  | Peroxiredoxin 2                                                 | <i>Prdx2</i>  | -3.89       | An anti-oxidant enzyme involved in redox regulation of the cell and reduces peroxides through the thioredoxin system. Peroxiredoxin 2 can inhibit cell <b>apoptosis</b> through the <b>NF-kappa-B</b> pathway.                                                                                                                        |
| BE852181  | Rho family GTPase 1                                             | <i>Rnd1</i>   | -3.60       | Multifunctional regulator of the cytoskeleton and <b>cell cycle progression</b> .                                                                                                                                                                                                                                                     |
| BB277065  | Traf2 binding protein                                           | <i>T2bp</i>   | -3.46       | Adapter protein which mediates IRAK1 and TRAF2 interaction, resulting in the downstream activation of <b>NF-kappa-B</b> and AP-1 pathways. Can play a role in <b>apoptosis</b> regulation. NfκB and Bcl2 pathway is blocked by induction of Tnf receptor-associated factor 2-inhibiting protein (Traip)                               |
| NM_010809 | Matrix metalloproteinase 3                                      | <i>Mmp3</i>   | -3.35       | <i>Mmp3</i> can degrade fibronectin, laminin, gelatins of type I, III, IV, and V; collagens III, IV, X, and IX, and cartilage proteoglycans.                                                                                                                                                                                          |
| BC015293  | Gremlin 1                                                       | <i>Grem1</i>  | -3.17       | A cytokine that may play an important role during carcinogenesis and metanephric kidney organogenesis, as a BMP antagonist required for early limb outgrowth and patterning in maintaining the FGF4-SHH feedback loop. Down-regulates the BMP4 signalling in a dose-dependent manner.                                                 |
| NM_133232 | 6-phosphofructo-2-kinase/fructose-2,6-biphosphatase 3           | <i>Pfkfb3</i> | -3.10       | Protein involved in synthesis and degradation of fructose 2,6-bisphosphate. Can increase cell <b>proliferation</b> via cyclin-dependent kinases.                                                                                                                                                                                      |
| NM_054088 | Patatin-like phospholipase domain containing 3                  | <i>Pnpla3</i> | -3.09       | Multifunctional enzyme which has both triacylglycerol lipase and acylglycerol O-acyltransferase activities. Plays a role in <b>glucose metabolism</b> .                                                                                                                                                                               |
| NM_007539 | Bradykinin receptor, beta 1                                     | <i>Bdkrb1</i> | -2.99       | A receptor for bradykinin that can have a <b>protective role</b> in ischemia/riperfusion injury by reducing <b>apoptosis</b> .                                                                                                                                                                                                        |
| NM_009140 | Chemokine (C-X-C motif) ligand 2                                | <i>Cxcl2</i>  | -2.94       | CXCL2 mRNA induction can be mediated by p38, JNK and <b>NF-κB signalling</b> pathways. The knockdown of CXCL2 inhibits <b>proliferation</b> and ERK activation in bone marrow-derived macrophages.                                                                                                                                    |
| BC019961  | Chemokine (C-X-C motif) ligand 16                               | <i>Cxcl16</i> | -2.92       | A pro-inflammatory cytokine, CXCL16/CXCR6 may play important roles in cell growth and proliferation. Possibly involved in the translocation of nuclear factor-κB ( <b>NF-κB</b> ) p65 to the nucleus.                                                                                                                                 |
| BB164127  | Human immunodeficiency virus type 1 enhancer binding protein 3  | <i>Hivep3</i> | -2.88       | A zinc finger transcription factor, HIVEP3/KRC enhances <b>NF-κB</b> -dependent transactivation and JNK phosphorylation and therefore apoptosis and cytokine gene expression. The effect of HIVEP3/KRC is mediated through its interaction with the adaptor protein TRAF2, which intersects both pathways.                            |
| NM_009311 | Tachykinin 1                                                    | <i>Tac1</i>   | -2.81       | <i>Tac1</i> encodes peptides belong to the tachykinin family of neuropeptides. <b>NF-κB</b> is implicated in the repression of <i>Tac1</i> at high levels of the CXC chemokine, stromal cell-derived factor-1alpha (SDF-1alpha).                                                                                                      |
| BB185854  | Alpha-2-macroglobulin                                           | <i>A2m</i>    | -2.75       | Is able to inhibit all four classes of proteinases by a unique 'trapping' mechanism. Its MMPs inhibitory effect might play a role in skeletal development and homeostasis. <i>A2m</i> can induce JAK/STAT pathway activation.                                                                                                         |
| AY078071  | otospiralin                                                     | <i>Otos</i>   | -2.73       | Up regulation of <i>Otos</i> significantly <b>decreased apoptosis</b> through activation of ERK and partial inhibition of JNK and mitochondrial pathways.                                                                                                                                                                             |
| BM210600  | Sulfiredoxin 1 homolog ( <i>S. cerevisiae</i> )                 | <i>Srxn1</i>  | -2.72       | Important in <b>oxidative stress</b> resistance by reducing cysteine-sulfinic acid formed under exposure to oxidants in the peroxiredoxins PRDX1, PRDX2, PRDX3 and PRDX4. <i>Srxn1</i> is a <b>NF-κB</b> regulated gene under both stressed and unstressed conditions.                                                                |
| BG072958  | R-spondin 3 homolog ( <i>Xenopus laevis</i> )                   | <i>Rspo3</i>  | -2.69       | The R-spondins (RSPOs) are a recently described family of secreted proteins that activate WNT and β-catenin signalling cascades. <i>Rspo3</i> binds syndecan 4 (Sdc4) and that together they activate Wnt and PCP signalling. Mice lacking <i>Rspo3</i> develop craniofacial abnormalities and have increased <b>cell apoptosis</b> . |

**Supp. Table S5. The top 20 most significantly up regulated genes in chondrocytes from 5 day old *Comp p.D469del<sup>m/m</sup>* mutant mice relative to wild type**

| Gene ID   | Gene Name                                                                       | Gene Symbol    | Fold change | Putative role in PSACH pathology                                                                                                                                                                                                                                                                      |
|-----------|---------------------------------------------------------------------------------|----------------|-------------|-------------------------------------------------------------------------------------------------------------------------------------------------------------------------------------------------------------------------------------------------------------------------------------------------------|
| AW910504  | Ectonucleotide pyrophosphatase/phosphodiesterase 1                              | <i>Enpp1</i>   | 4.11        | Functions in bone mineralization and regulated by FGF2 in an ERK MAPK-dependent manner. A negative regulator of insulin receptor (IR) activation. Mutations cause hypophosphatemic rickets.                                                                                                           |
| BB181225  | Potassium voltage-gated channel, subfamily Q, member 5                          | <i>Kcnq5</i>   | 3.56        | Role in potassium channel regulation which might be involved in <b>protection against apoptosis</b> induced by <b>oxidative stress</b> and also <b>cell proliferation</b> .                                                                                                                           |
| AV229143  | Interferon activated gene 202B                                                  | <i>Ifi202b</i> | 3.47        | Interferon-inducible gene that along with survivin plays a role in <b>protection against apoptosis</b> and <b>cell proliferation</b> .                                                                                                                                                                |
| AI840829  | Calcium/calmodulin-dependent protein kinase IV                                  | <i>Camk4</i>   | 3.33        | Calcium/calmodulin-dependent protein kinase that regulates calcium-dependant gene expression and along with growth factor erv1-like (Gfer) <b>regulates cell proliferation</b> . Regulated by Wnt signalling and believed to have a cell protective role in Alzheimers and transient global ischemia. |
| BG072739  | SRY-box containing gene 11                                                      | <i>Sox11</i>   | 3.16        | Important for <b>cell survival</b> and growth and chondrogenesis.                                                                                                                                                                                                                                     |
| AI324124  | Synuclein, alpha                                                                | <i>Snca</i>    | 3.06        | Reduces cells response to various <b>apoptotic stimuli</b> leading to decreased caspase-3 activation.                                                                                                                                                                                                 |
| NM_008537 | Alpha-methylacyl-CoA racemase                                                   | <i>Amacr</i>   | 2.73        | Enzyme responsible for the racemization of branched-chain lipids. Important in <b>oxidative degradation pathways</b> and regulates entry into the peroxisomal and mitochondrial beta-oxidation pathways.                                                                                              |
| NM_010442 | Heme oxygenase (decycling) 1                                                    | <i>Hmox1</i>   | 2.58        | Has <b>anti-oxidative activities</b> and can be up regulated by hydrogen peroxide. May protect against anoxia/reoxygenation-induced <b>apoptosis</b> .                                                                                                                                                |
| NM_007606 | Carbonic anhydrase 3                                                            | <i>Car3</i>    | 2.50        | Cytosolic zinc-containing metalloenzymes that catalyses reversible hydration of carbon dioxide and influence mineralization. Car3 can also respond to <b>oxidative stress</b> and has a protective role against hydrogen peroxide induced <b>apoptosis</b> .                                          |
| BB084936  | Arylsulfatase J                                                                 | <i>Arsj</i>    | 2.46        | Involved in hormone biosynthesis, modulation of cell signaling, and <b>degradation</b> of macromolecules.                                                                                                                                                                                             |
| AF260740  | Glycoprotein hormone alpha 2                                                    | <i>Gpha2</i>   | 2.36        | Stimulates the thyroid. Binds and activates THSR and increases cAMP production.                                                                                                                                                                                                                       |
| AV124537  | Lymphatic vessel endothelial hyaluronan receptor 1                              | <i>Lyve1</i>   | 2.33        | Plays a role in autocrine regulation of cell growth and may also act as a hyaluronan transporter. LYVE1 and thrombospondin-2 (THBS2) were identified as <b>mediators of IGFBP-3-dependent effects</b> .                                                                                               |
| BB035005  | Multimerin 1                                                                    | <i>Mmrn1</i>   | 2.30        | Large, homopolymeric adhesive protein that plays a role in the storage and stabilization of factor V in platelets. May function as an extracellular matrix or adhesive protein. Neighbouring gene to <b>Snca</b> in the mouse genome                                                                  |
| BG073776  | Interleukin 1 receptor-like 2                                                   | <i>Il1rl2</i>  | 2.21        | Receptor for interleukin 1 family member 9 (IL1F9). Binding to the agonist leads to the activation of <b>NF-κB</b> . May play a role in the pathogenesis of distal interphalangeal osteoarthritis.                                                                                                    |
| AV321547  | Decorin                                                                         | <i>Dcn</i>     | 2.21        | Plays a role in matrix assembly. A <b>cell-cycle regulator</b> that can reduce cell <b>proliferation</b> by induction of <b>apoptosis</b> .                                                                                                                                                           |
| NM_009982 | Cathepsin C                                                                     | <i>Ctsc</i>    | 2.17        | Thiol protease with dipeptidylpeptidase activity. Activate serine proteases making them capable of <b>degrading</b> various extracellular matrix components.                                                                                                                                          |
| NM_010417 | Hephaestin                                                                      | <i>Heph</i>    | 2.16        | Functions as a multicopper ferroxidase and over-expression can attenuate iron-induced <b>oxidative stress in vitro</b> .                                                                                                                                                                              |
| U73910    | Phosphate regulating gene with homologies to endopeptidases on the X chromosome | <i>Phex</i>    | 2.16        | A zinc endopeptidase involved in bone mineralization and mutations cause hypophosphatemic rickets. <b>NF-κB</b> signalling and PARP-1 enzymatic activity cooperatively contributes to the constitutive suppression of Phex.                                                                           |
| NM_007727 | Contactin 1                                                                     | <i>Cntn1</i>   | 2.08        | Contactins are membrane anchored cell adhesion molecules that mediate <b>cell surface interactions</b> during development via interaction with chondroitin sulfate E.                                                                                                                                 |
| NM_007429 | Angiotensin II receptor, type 2                                                 | <i>Agtr2</i>   | 2.07        | Receptor for angiotensin II and cooperates with MTUS1 to inhibit ERK2 activation and <b>cell proliferation</b> . <i>Agtr2</i> induces <b>NF-κB</b> -mediated transcription and expression of <b>NF-κB</b> -related genes.                                                                             |

**Supp. Table S6. The top 20 most significantly down regulated genes in chondrocytes from 5 day old *Comp* p.D469del<sup>m/m</sup> compared to wild type**

| Gene ID   | Gene Name                                                                       | Gene Symbol    | Fold change | Putative role in PSACH pathology                                                                                                                                                                                                                                                    |
|-----------|---------------------------------------------------------------------------------|----------------|-------------|-------------------------------------------------------------------------------------------------------------------------------------------------------------------------------------------------------------------------------------------------------------------------------------|
| AA210261  | DEAD (Asp-Glu-Ala-Asp) box polypeptide 3, Y-linked                              | <i>Ddx3y</i>   | -7.93       | DEAD-box RNA helicases have been implicated a variety of processes that regulate gene expression, such as transcription, splicing, mRNA export and translation. It is also proposed to be involved in <b>cell cycle</b> control and the regulation of <b>apoptosis</b> .            |
| AV348246  | Neuronal PAS domain protein 4                                                   | <i>Npas4</i>   | -4.48       | Transcription factor that is implicated in adaptation to cellular and <b>oxidative stresses</b> .                                                                                                                                                                                   |
| BB656631  | SRY-box containing gene 11                                                      | <i>Sox11</i>   | -3.53       | Probably important in the developing nervous system. May also have a role in lymphocyte proliferation.                                                                                                                                                                              |
| NM_012011 | Eukaryotic translation initiation factor 2, subunit 3, structural gene Y-linked | <i>Eif2s3y</i> | -3.15       | Along with <i>Ddx3y</i> it is induced following angiotensin II treatment of mice. <i>Eif2s3y</i> functions in the early steps of protein synthesis by forming a ternary complex with GTP and initiator tRNA.                                                                        |
| AK011963  | Peroxiredoxin 2                                                                 | <i>Prdx2</i>   | -2.91       | An anti-oxidant enzyme involved in redox regulation of the cell and reduces peroxides through the thioredoxin system. Peroxiredoxin 2 can inhibit cell <b>apoptosis</b> through the <b>NF-kappa-B</b> pathway.                                                                      |
| BB218576  | calcium/calmodulin-dependent protein kinase II, delta                           | <i>Camk2d</i>  | -2.74       | Angiotensin II-induced oxidative stress resets the Ca <sup>2+</sup> dependence of <i>Camk2d</i> and promotes cell death. Inhibition of <i>Camk2d</i> prevents an increase in p53 and <b>apoptosis</b> .                                                                             |
| NM_133743 | Ly6/Plaur domain containing 3                                                   | <i>Lypd3</i>   | -2.67       | Supports <b>cell migration</b> and may be involved in cell-matrix <b>interactions</b> .                                                                                                                                                                                             |
| NM_008127 | Gap junction protein, beta 4                                                    | <i>Gjb4</i>    | -2.44       | Gap junction protein that is also known as connexin Cx30.3 and thought to mediate cell-cell communication.                                                                                                                                                                          |
| AU046270  | Acireductone dioxygenase 1                                                      | <i>Adi1</i>    | -2.38       | <i>Adi1</i> is a member of the Cupin superfamily, which binds to and inhibits the activities of membrane-type 1 matrix metalloproteinase (MMP14). Increased <i>Adi1</i> expression can cause <b>apoptosis</b> .                                                                     |
| BC004633  | NADH dehydrogenase (ubiquinone) 1 alpha subcomplex, 12                          | <i>Ndufa12</i> | -2.20       | Accessory subunit of the <b>mitochondrial</b> membrane respiratory chain NADH dehydrogenase (Complex I)                                                                                                                                                                             |
| AV128350  | Block of proliferation 1                                                        | <i>Bop1</i>    | -2.14       | Component of the Pes1-Bop1-WDR12 (PeBoW) complex, which is required for maturation of 28S and 5.8S ribosomal RNAs and formation of the 60S ribosome. May play a role in cytoskeletal remodelling. PeBoW complex is required for ribosome biogenesis and <b>cell proliferation</b> . |
| BF148215  | Strawberry notch homolog 2 (Drosophila)                                         | <i>Sbno2</i>   | -2.12       | <i>Sbno2</i> has transcriptional repression activity and has been shown to repress <b>NF-kappa-B</b> signalling.                                                                                                                                                                    |
| NM_009864 | Cadherin 1                                                                      | <i>Cdh1</i>    | -2.11       | Involved in mechanisms regulating cell-cell adhesions, mobility and <b>proliferation</b> of epithelial cells. Has a potent invasive suppressor role and is a ligand for integrin alpha-E/beta-7.                                                                                    |
| L07264    | Heparin-binding EGF-like growth factor                                          | <i>Hbegf</i>   | -2.09       | <b>Cell migration</b> can be mediated by MMP7-mediated release of HBEGF that activates ERBB1 and downstream ERK and PI3K <b>signalling</b> .                                                                                                                                        |
| NM_053015 | Melanophilin                                                                    | <i>Mlph</i>    | -2.07       | Rab effector protein involved in melanosome transport. The actin-activated MgATPase activity of myosin 5a is activated by binding to melanophilin. Myosin 5 is a motor protein that moves cargoes along actin filaments.                                                            |
| BB486599  | ST8 alpha-N-acetyl-neuraminidase alpha-2,8-sialyltransferase 6                  | <i>St8sia6</i> | -2.06       | Belongs to a family of sialyltransferases that synthesize sialylglycoconjugates. Prefers O-glycans to N-glycans or glycolipids as acceptor substrates.                                                                                                                              |
| AK009828  | Neuraminidase 2                                                                 | <i>Neu2</i>    | -2.06       | Remove sialic acid residues from glycoproteins and glycolipids.                                                                                                                                                                                                                     |
| AK019319  | Apolipoprotein E                                                                | <i>ApoE</i>    | -2.06       | Mediates the binding, internalization, and catabolism of lipoprotein particles.                                                                                                                                                                                                     |
| BF322712  | 3-hydroxybutyrate dehydrogenase, type 1                                         | <i>Bdh1</i>    | -2.04       | Catalyzes the interconversion of acetoacetate and (R)-3-hydroxybutyrate, the two major ketone bodies produced during fatty acid catabolism.                                                                                                                                         |
| AW553130  | Triple functional domain (PTPRF interacting)                                    | <i>Trio</i>    | -2.04       | Promotes the exchange of GDP by GTP. Together with leukocyte antigen-related (LAR) protein, it could play a role in coordinating cell-matrix and cytoskeletal rearrangements necessary for <b>cell migration</b> and cell growth.                                                   |
